# Supplementary material for: Presence–absence polymorphisms of single-copy genes in the stony coral Acropora digitifera
Source: PubMed Central journal article supplement (PMC7020367; doi:10.1186/s12864-020-6566-4), 2020-02-13
Supplement: 12864_2020_6566_MOESM1_ESM.pdf [file 12864_2020_6566_MOESM1_ESM.pdf]

**Additional file 1**

Figure S1

a

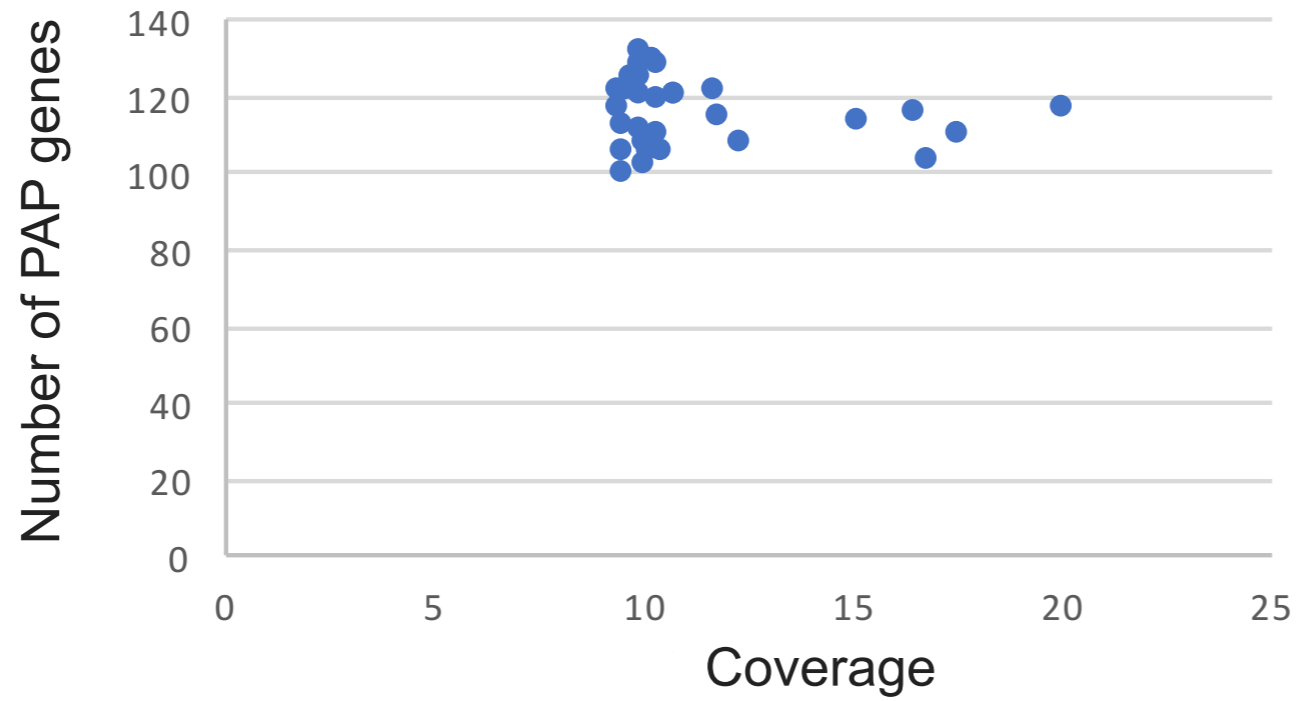

b

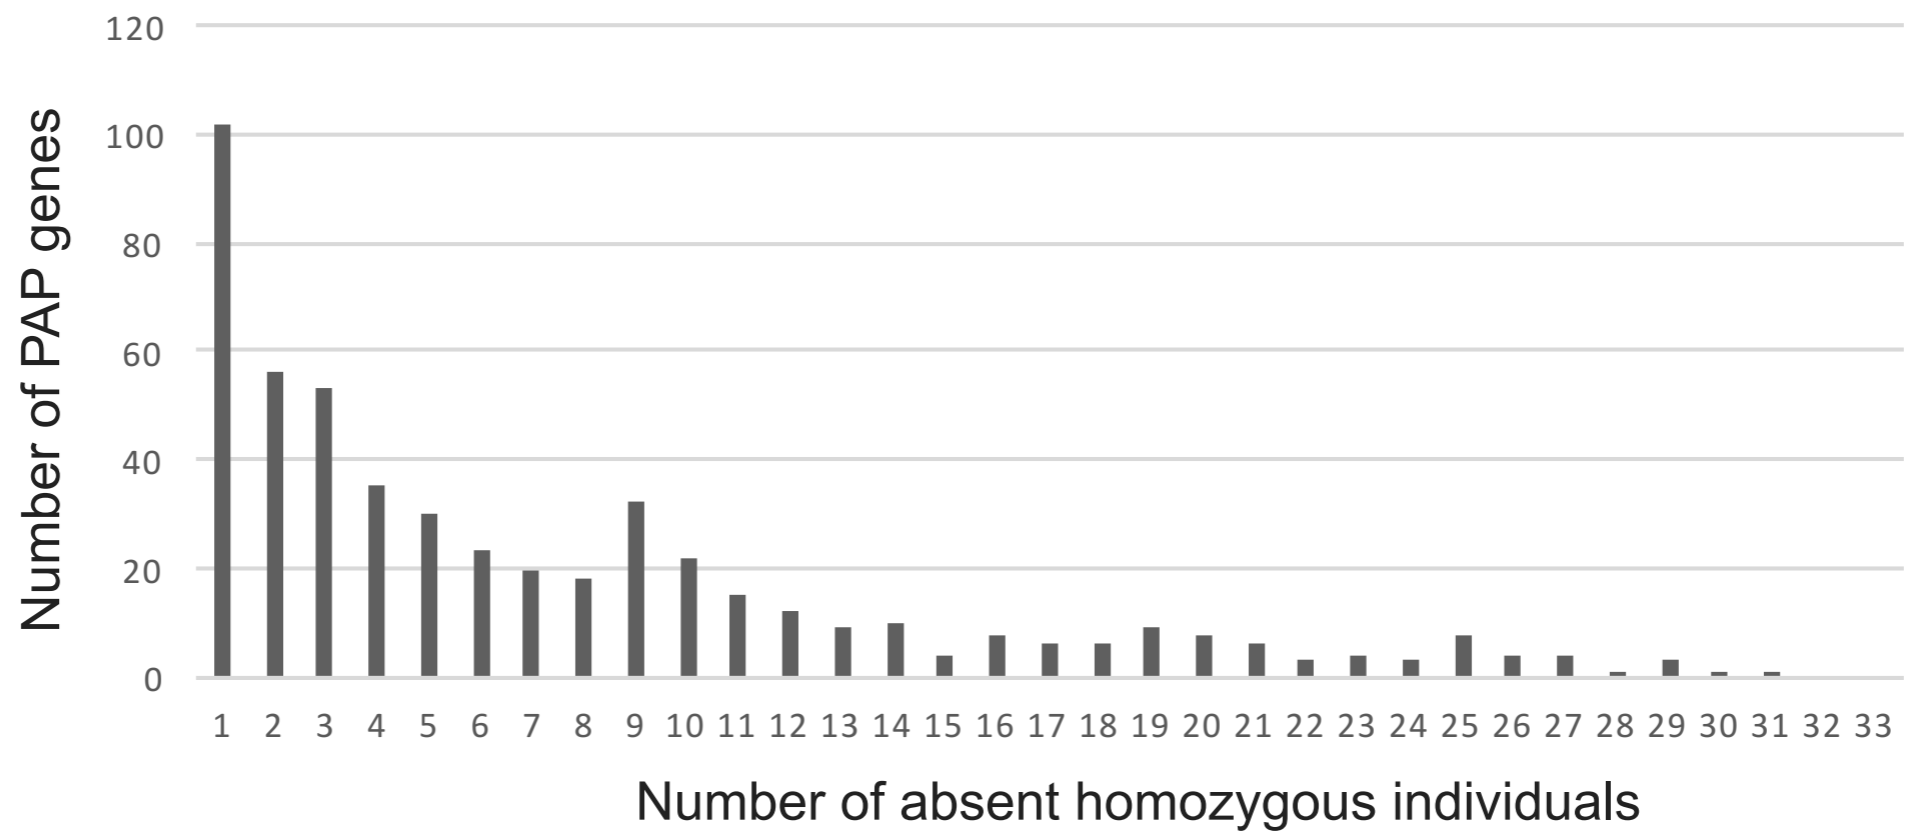

**Figure S1.** Number of PAP genes in 33 *A. digitifera* individuals

(a) The number of PAP genes (y axis) were plotted against mapping read coverage (x axis) for 33 individuals. (b) The number of PAP genes that were identified as absent homozygous in 1 to 33 individuals. The x-axis represents the numbers of absent homozygous individuals comparing with *A. digitifera* genome (ver. 1.1) for each PAP gene. The y-axis represents the number of PAP genes. 20% (102) PAP genes appeared in only one individual, and the remaining 80% (n = 414) appeared more than once.

**Figure S2**

**a**

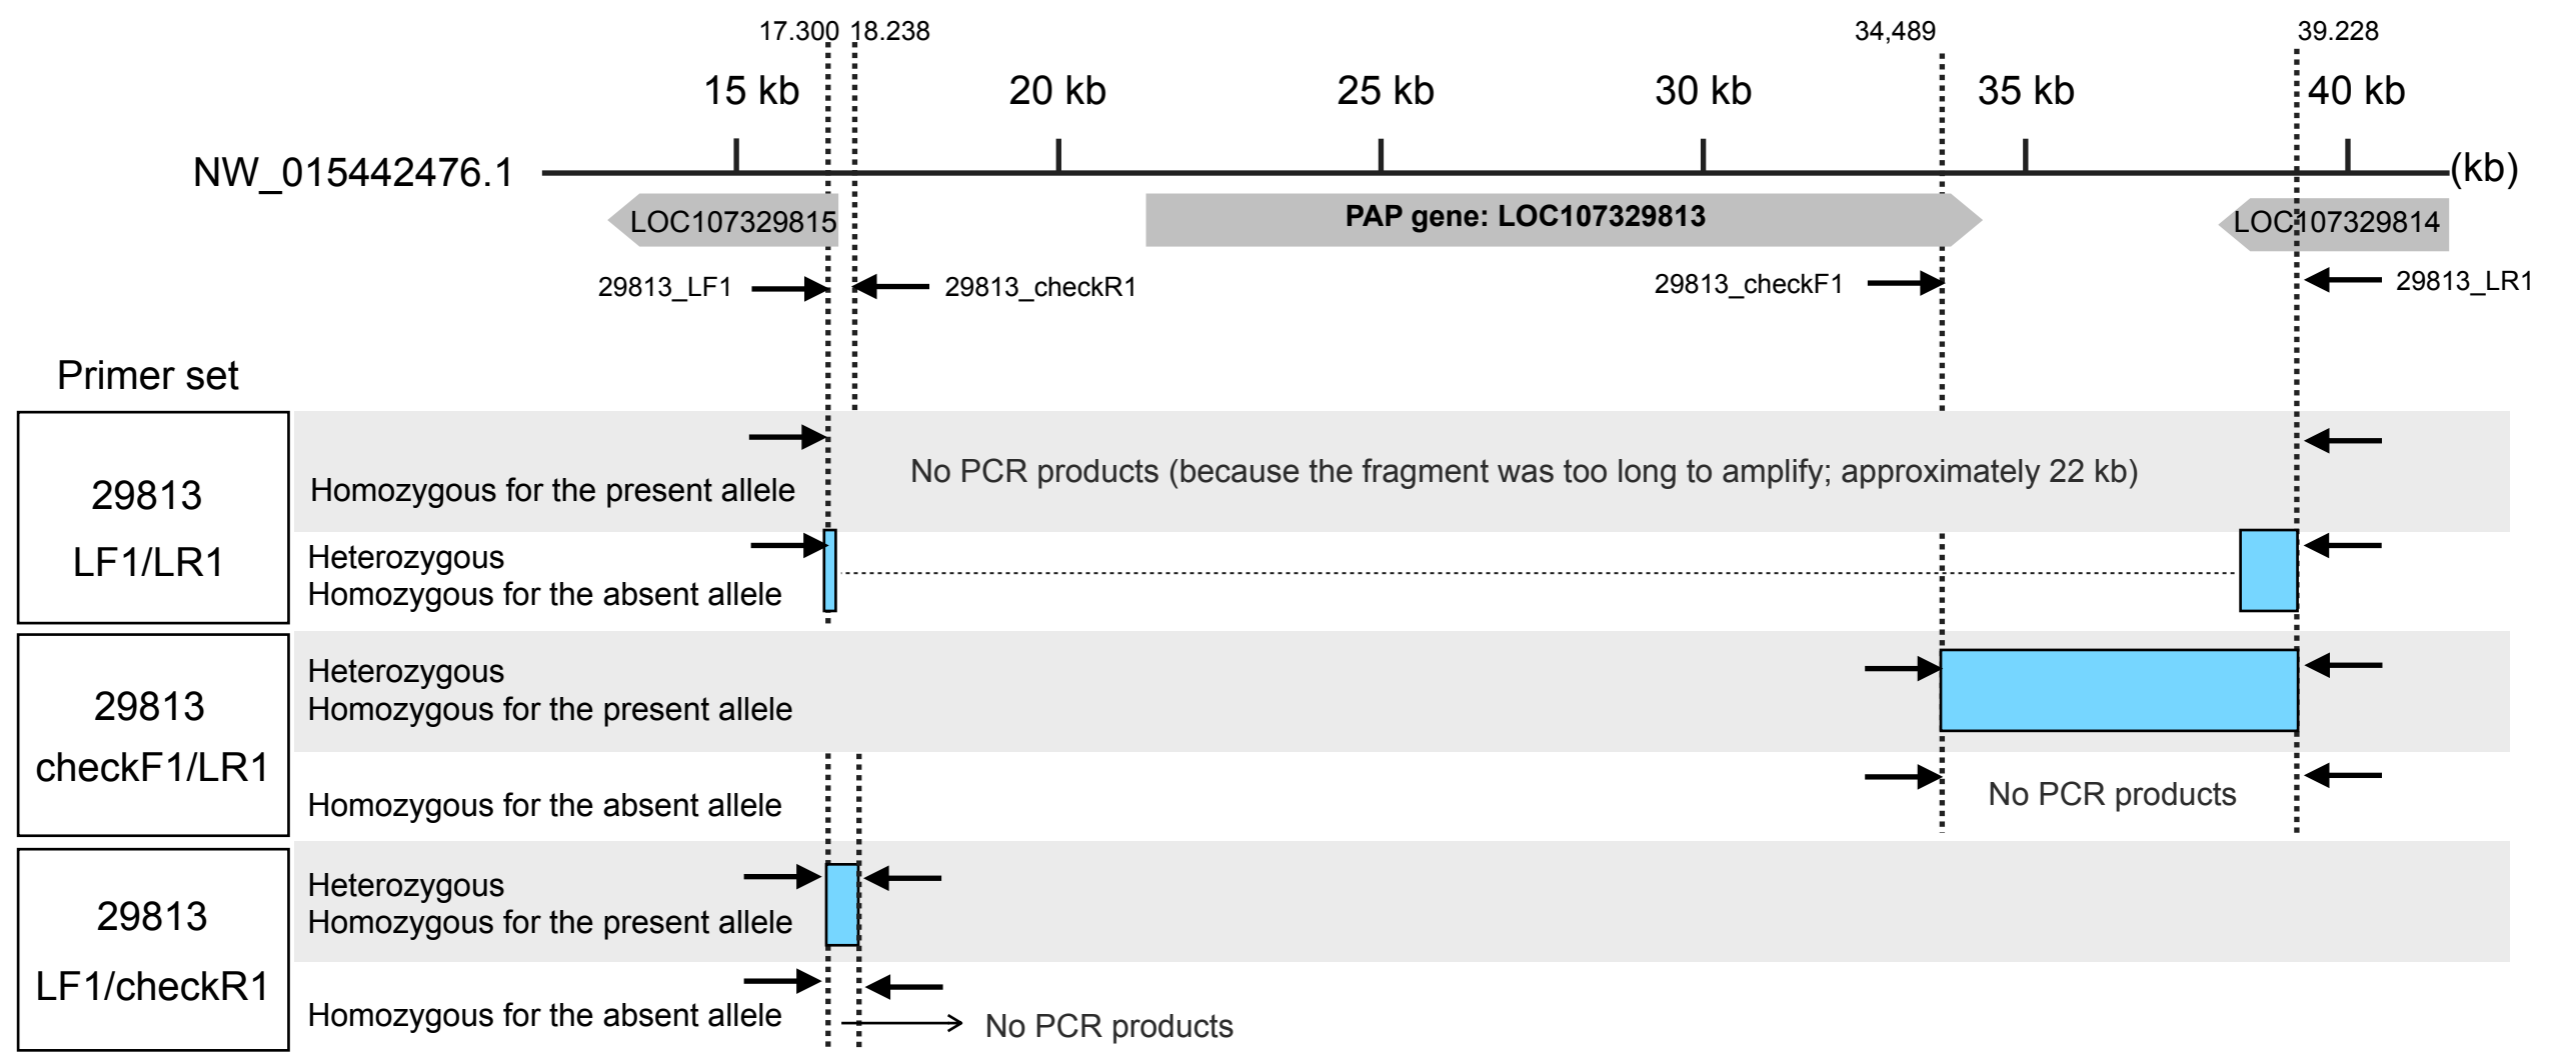

**29813(LF1/LR1)**

M1 M2 01 02 03 04 05 06 07 08 10 11 12 NC  
( A P P A P P P A P P A )

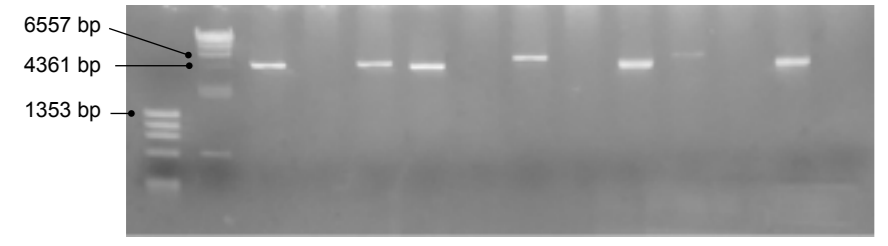

**29813(checkF1/LR1)**

M1 M2 01 02 03 04 05 06 07 08 10 11 12 NC  
( A P P A P P P A P P A )

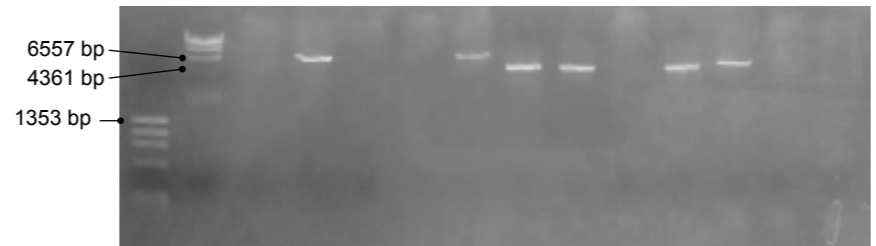

**29813(LF1/checkR1)**

M1 M2 01 02 03 04 05 06 07 08 10 11 12 NC  
( A P P A P P P A P P A )

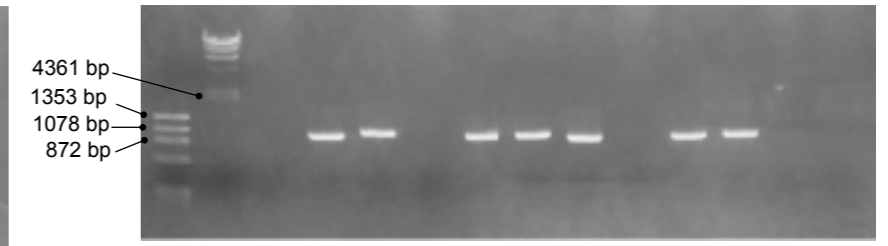

Figure S2

b

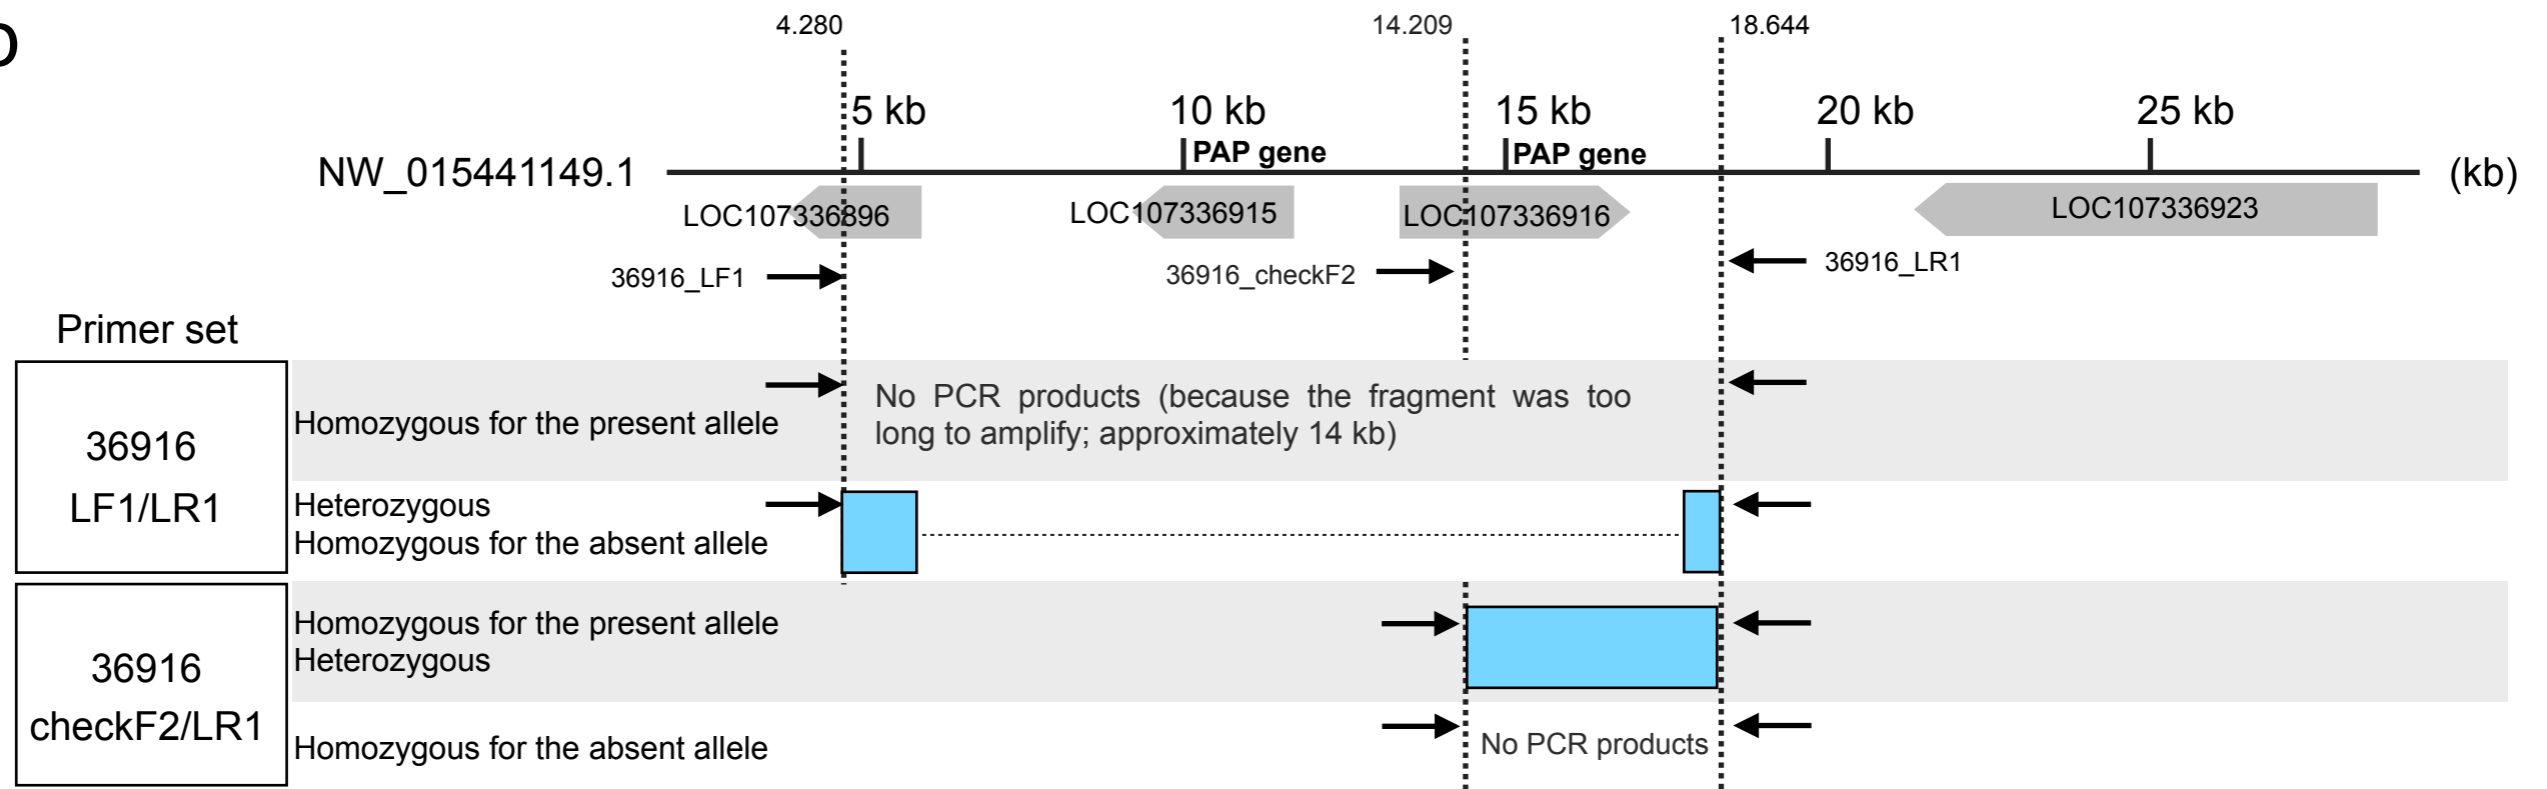

36916(LF1/LR1)

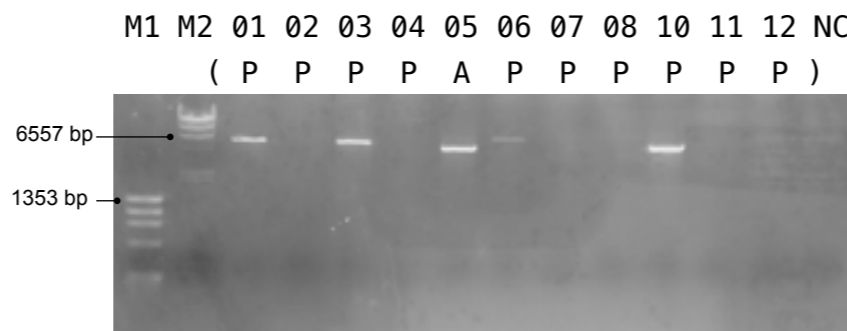

36916(checkF2/LR1)

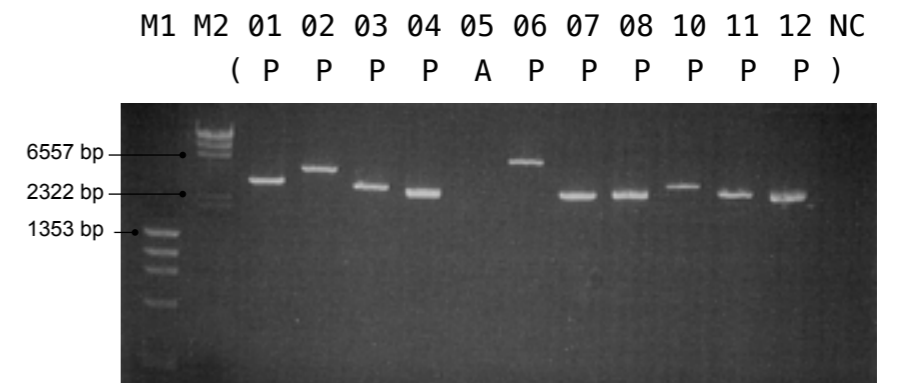

C

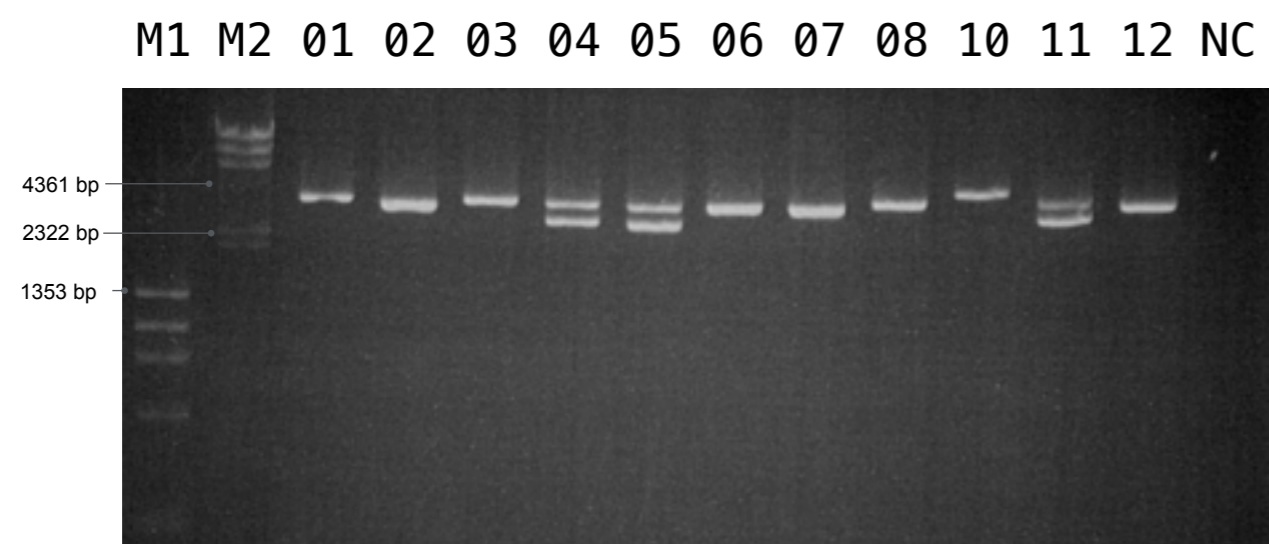

d

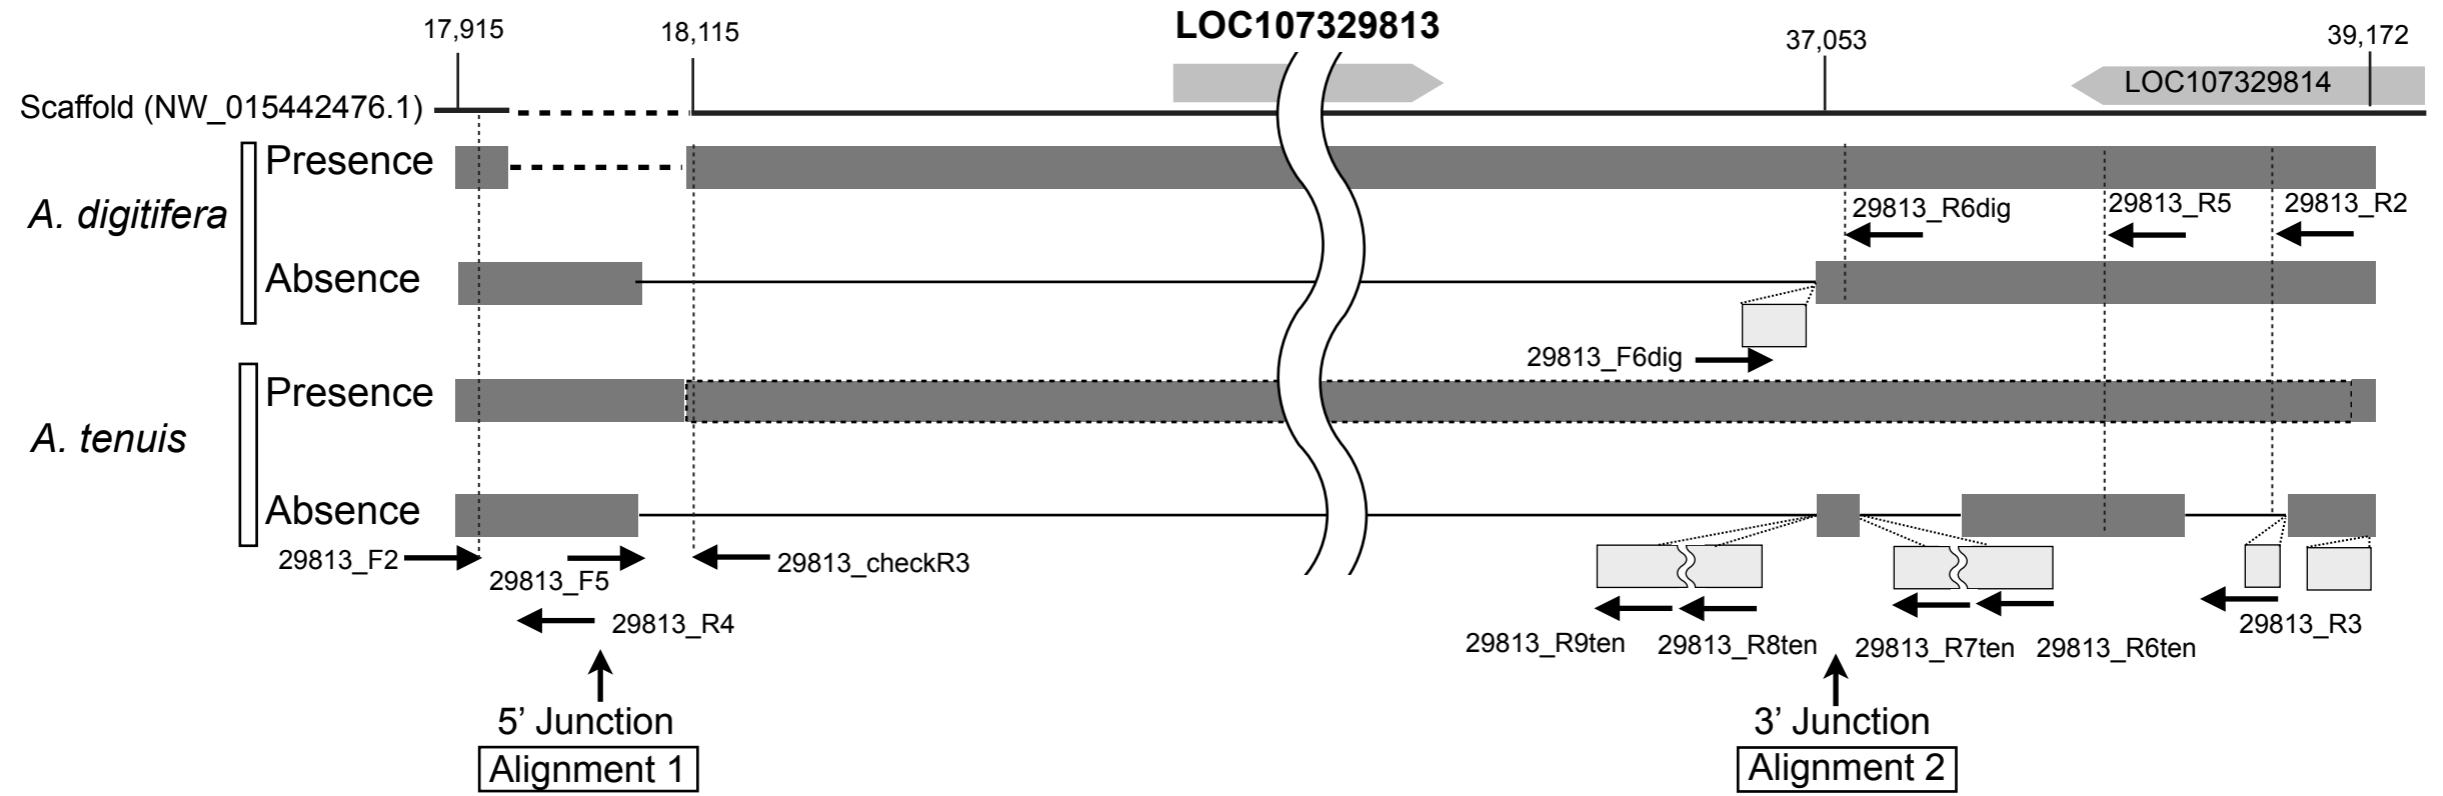

e

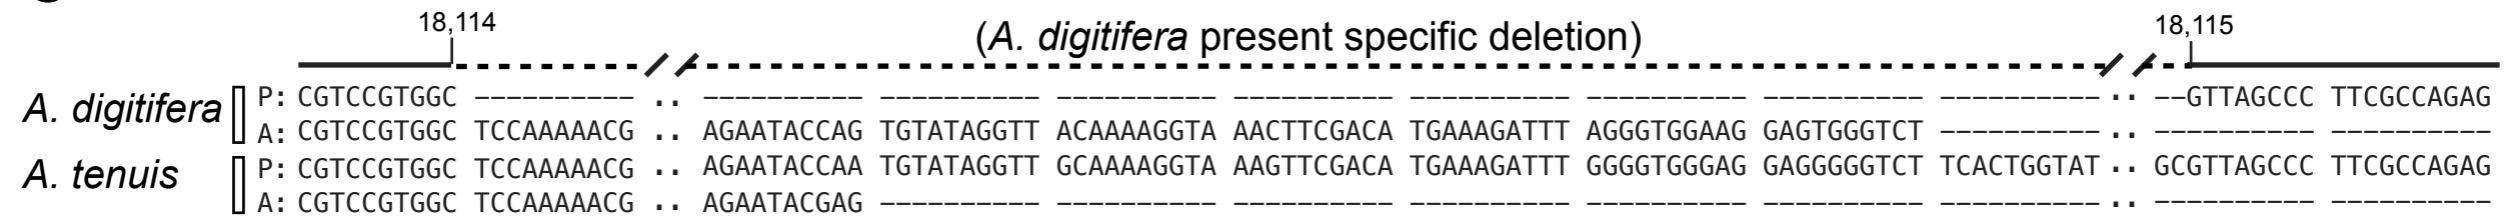

f

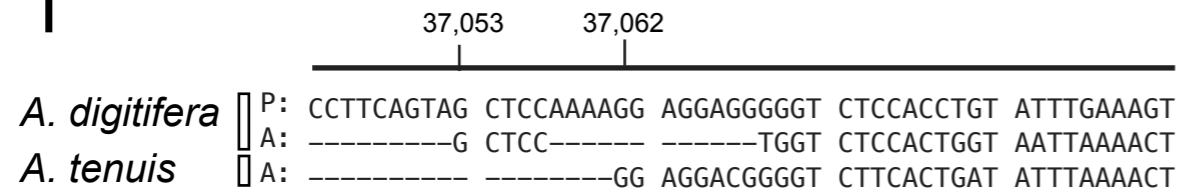

# Figure S2 (continued)

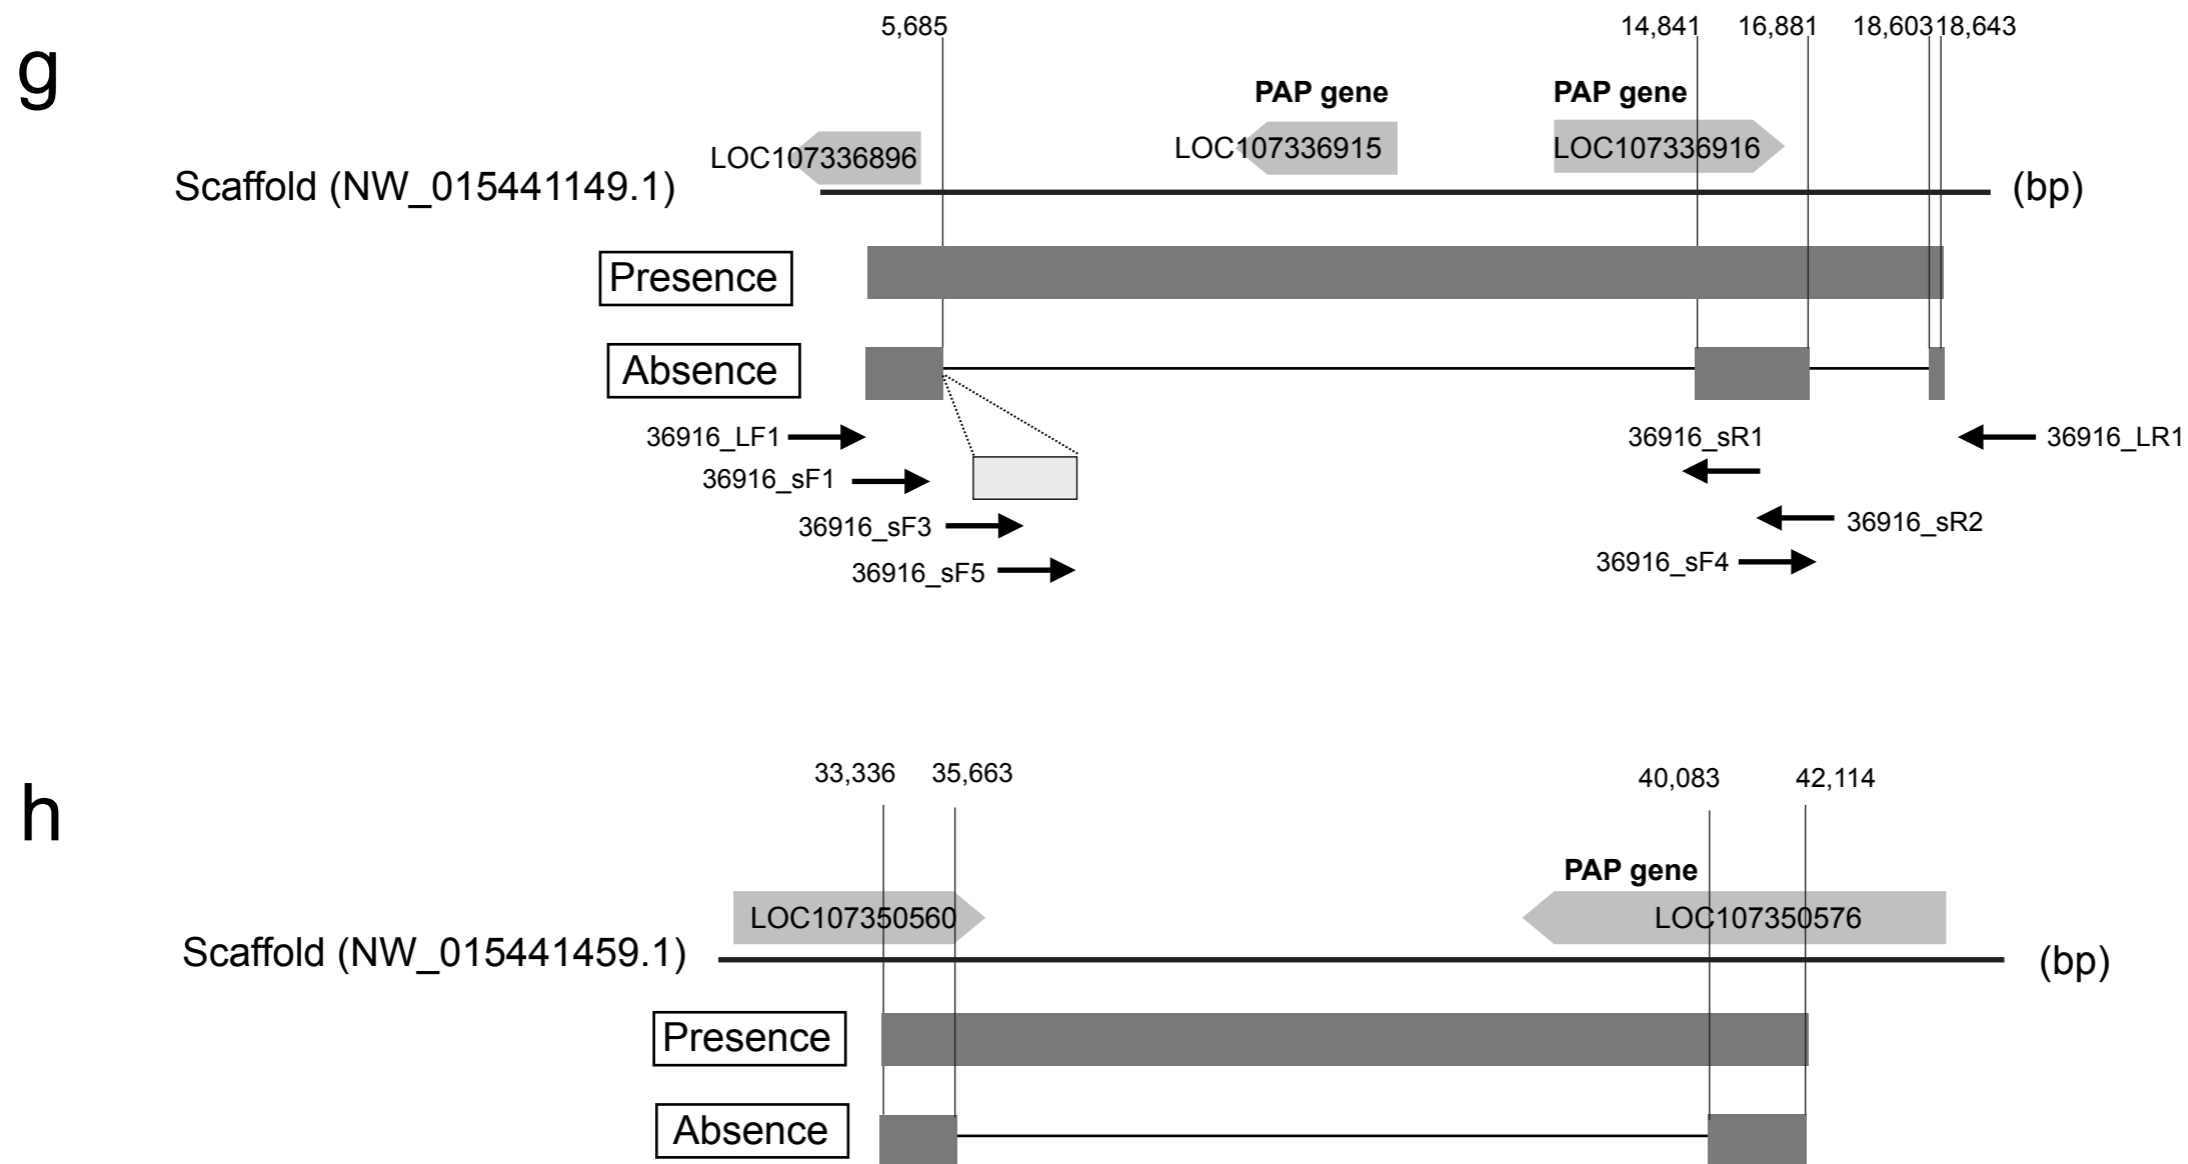

**Figure S2.** Electrophoresis patterns of PAPs among 11 *A. digitifera* individuals and the structures of PAP loci

The results of PCR products of (a) LOC107329813 and (b) LOC10736915-6. Positions of primers are indicated by arrows, under the schematic representations of genes. Primer names are given under each arrow. M1 and M2 indicate the molecular markers,  $\phi$ X174 HaeIII digest and  $\lambda$ -HindIII digest, respectively. Sample IDs S1601-S1612 are indicated as 01-12. NC indicates negative control. The state of presence (P) and absence (A) estimated by the no coverage region are also shown above the photos. Presence state included both presence homozygous and presence and absence heterozygous samples. In the central panel of (a), one sample (S1603) was expected as presence with a PCR product of present region. However, no PCR product was amplified. This may be due to a lack of coverage (indicating deletion) at the primer binding region. (c) The result of PCR for positive control to check the quality of genomic DNA of each sample. (d) Positions of primers for sequence determination of the absent region in LOC107329813. Alignments of 5' junction sequences and 3' junction sequences from present and absent alleles are shown in (e) and (f), respectively. (g) Positions of primers for sequence determination of the absent region in LOC10736915-6. (h) Boundaries of absent alleles shown by MinION reads.

# Figure S3

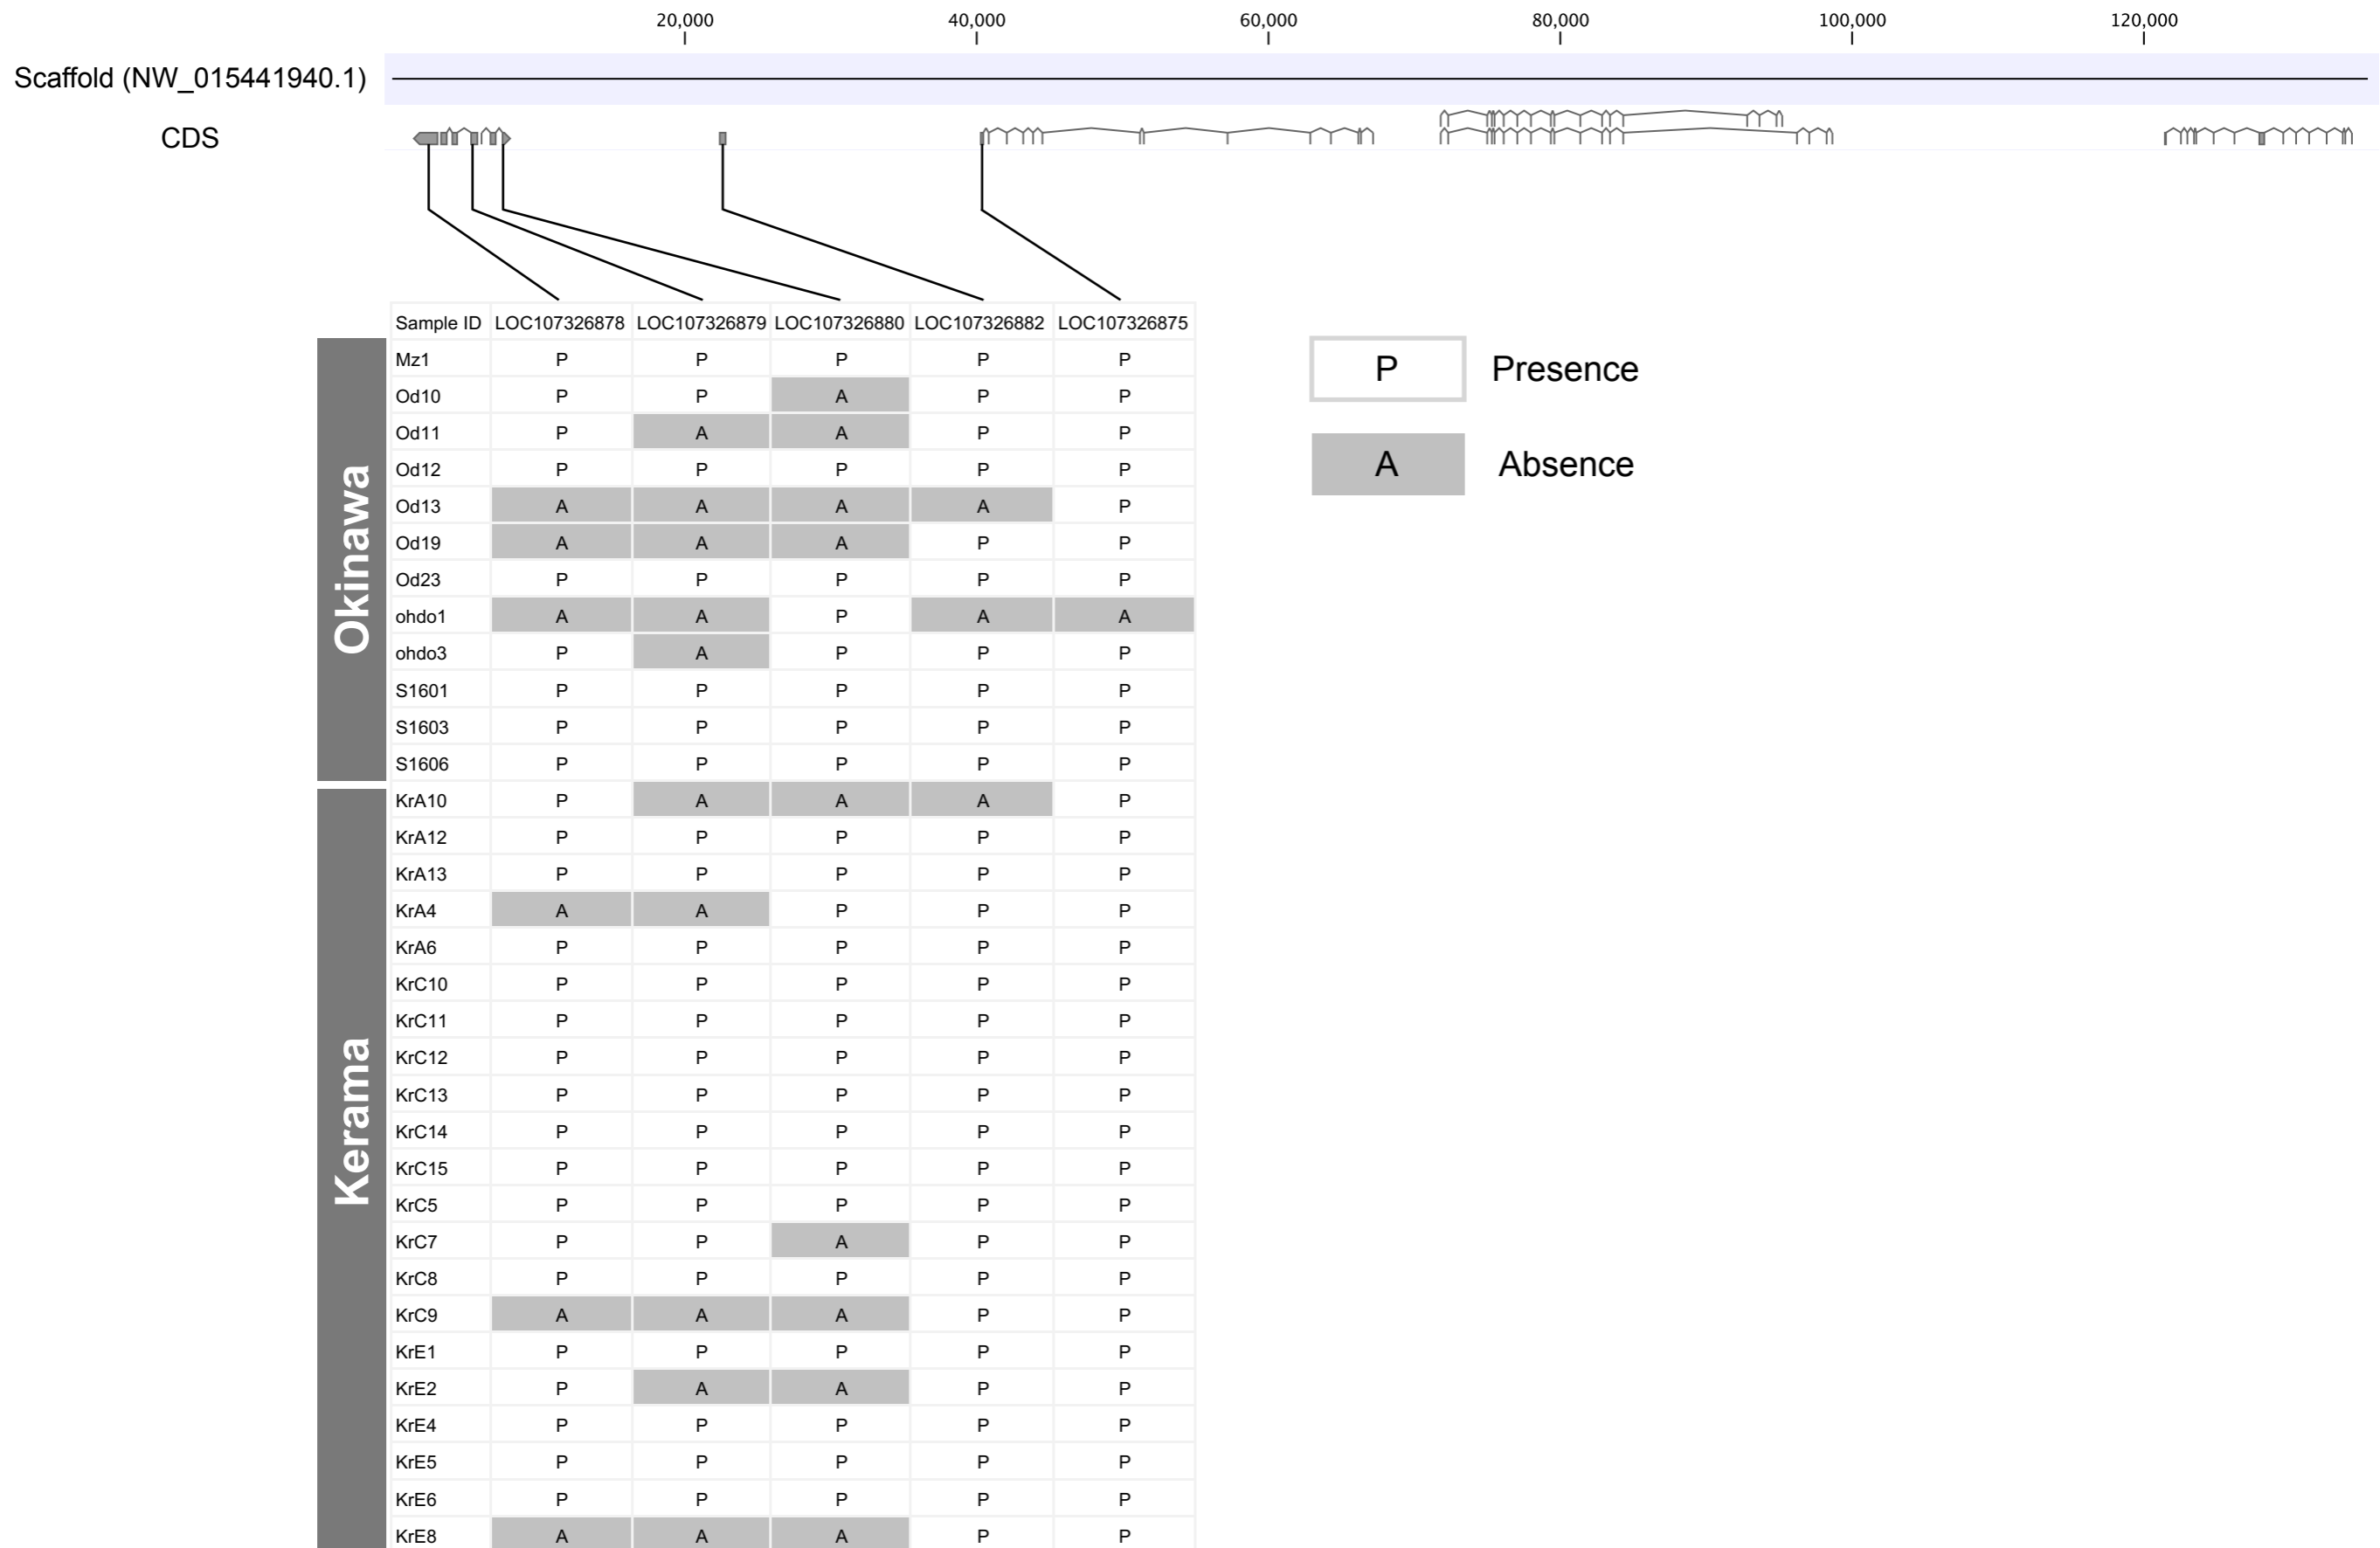

**Figure S3.** Combination of presence and absence status of eight PAP genes located on one scaffold. Schematic representations of a scaffold (NW\_015441940.1) with gene positions (arrows) shown at the top. Rows indicate 33 individuals from two subpopulations. Columns are PAP genes, and the positions are shown by gray arrows at the top. Presence and absence status is shown by white and grey, respectively.



# Figure S4

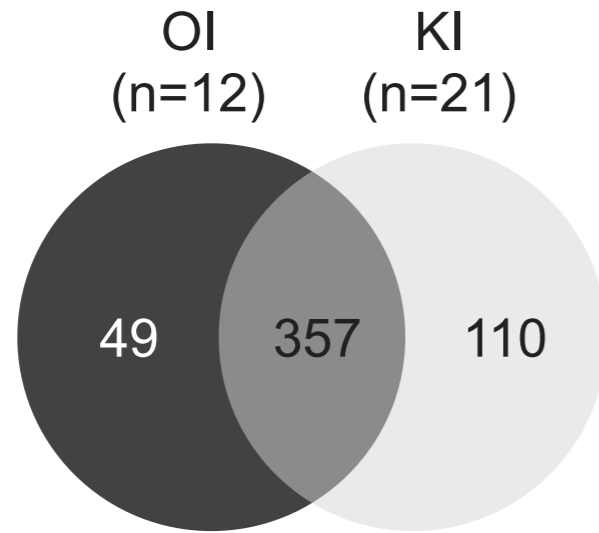

**Figure S4.** The Venn diagram of PAP genes identified in two subpopulations

The numbers of PAP genes specific to subpopulations and shared among subpopulations are in the Venn diagram.

**Figure S5**

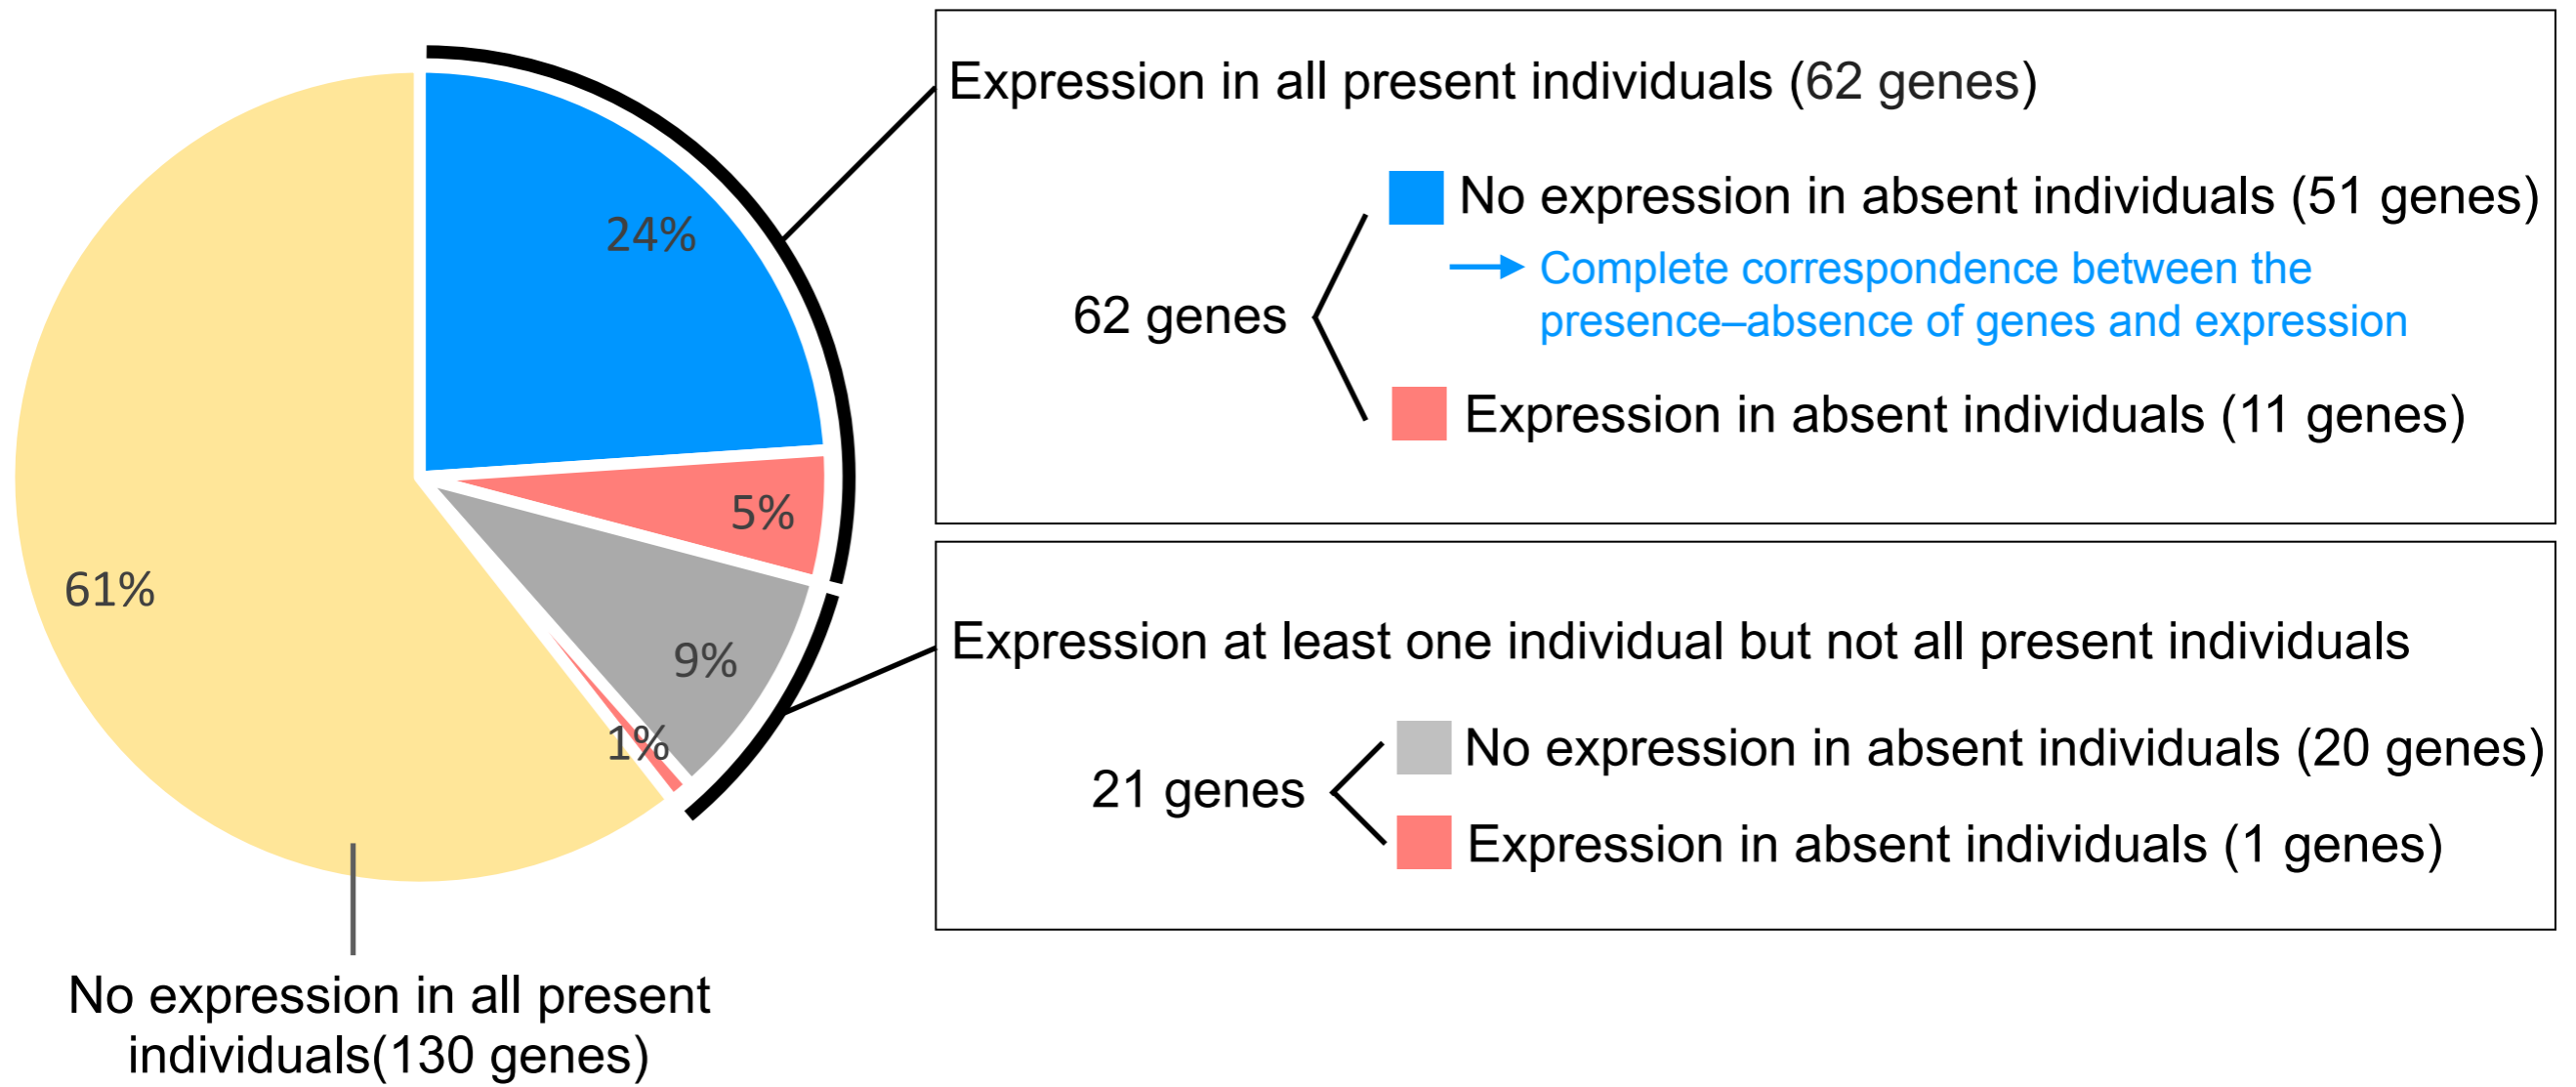

**Figure S5.** Expressions of genes showing PAPs in three individuals.

Figure S6

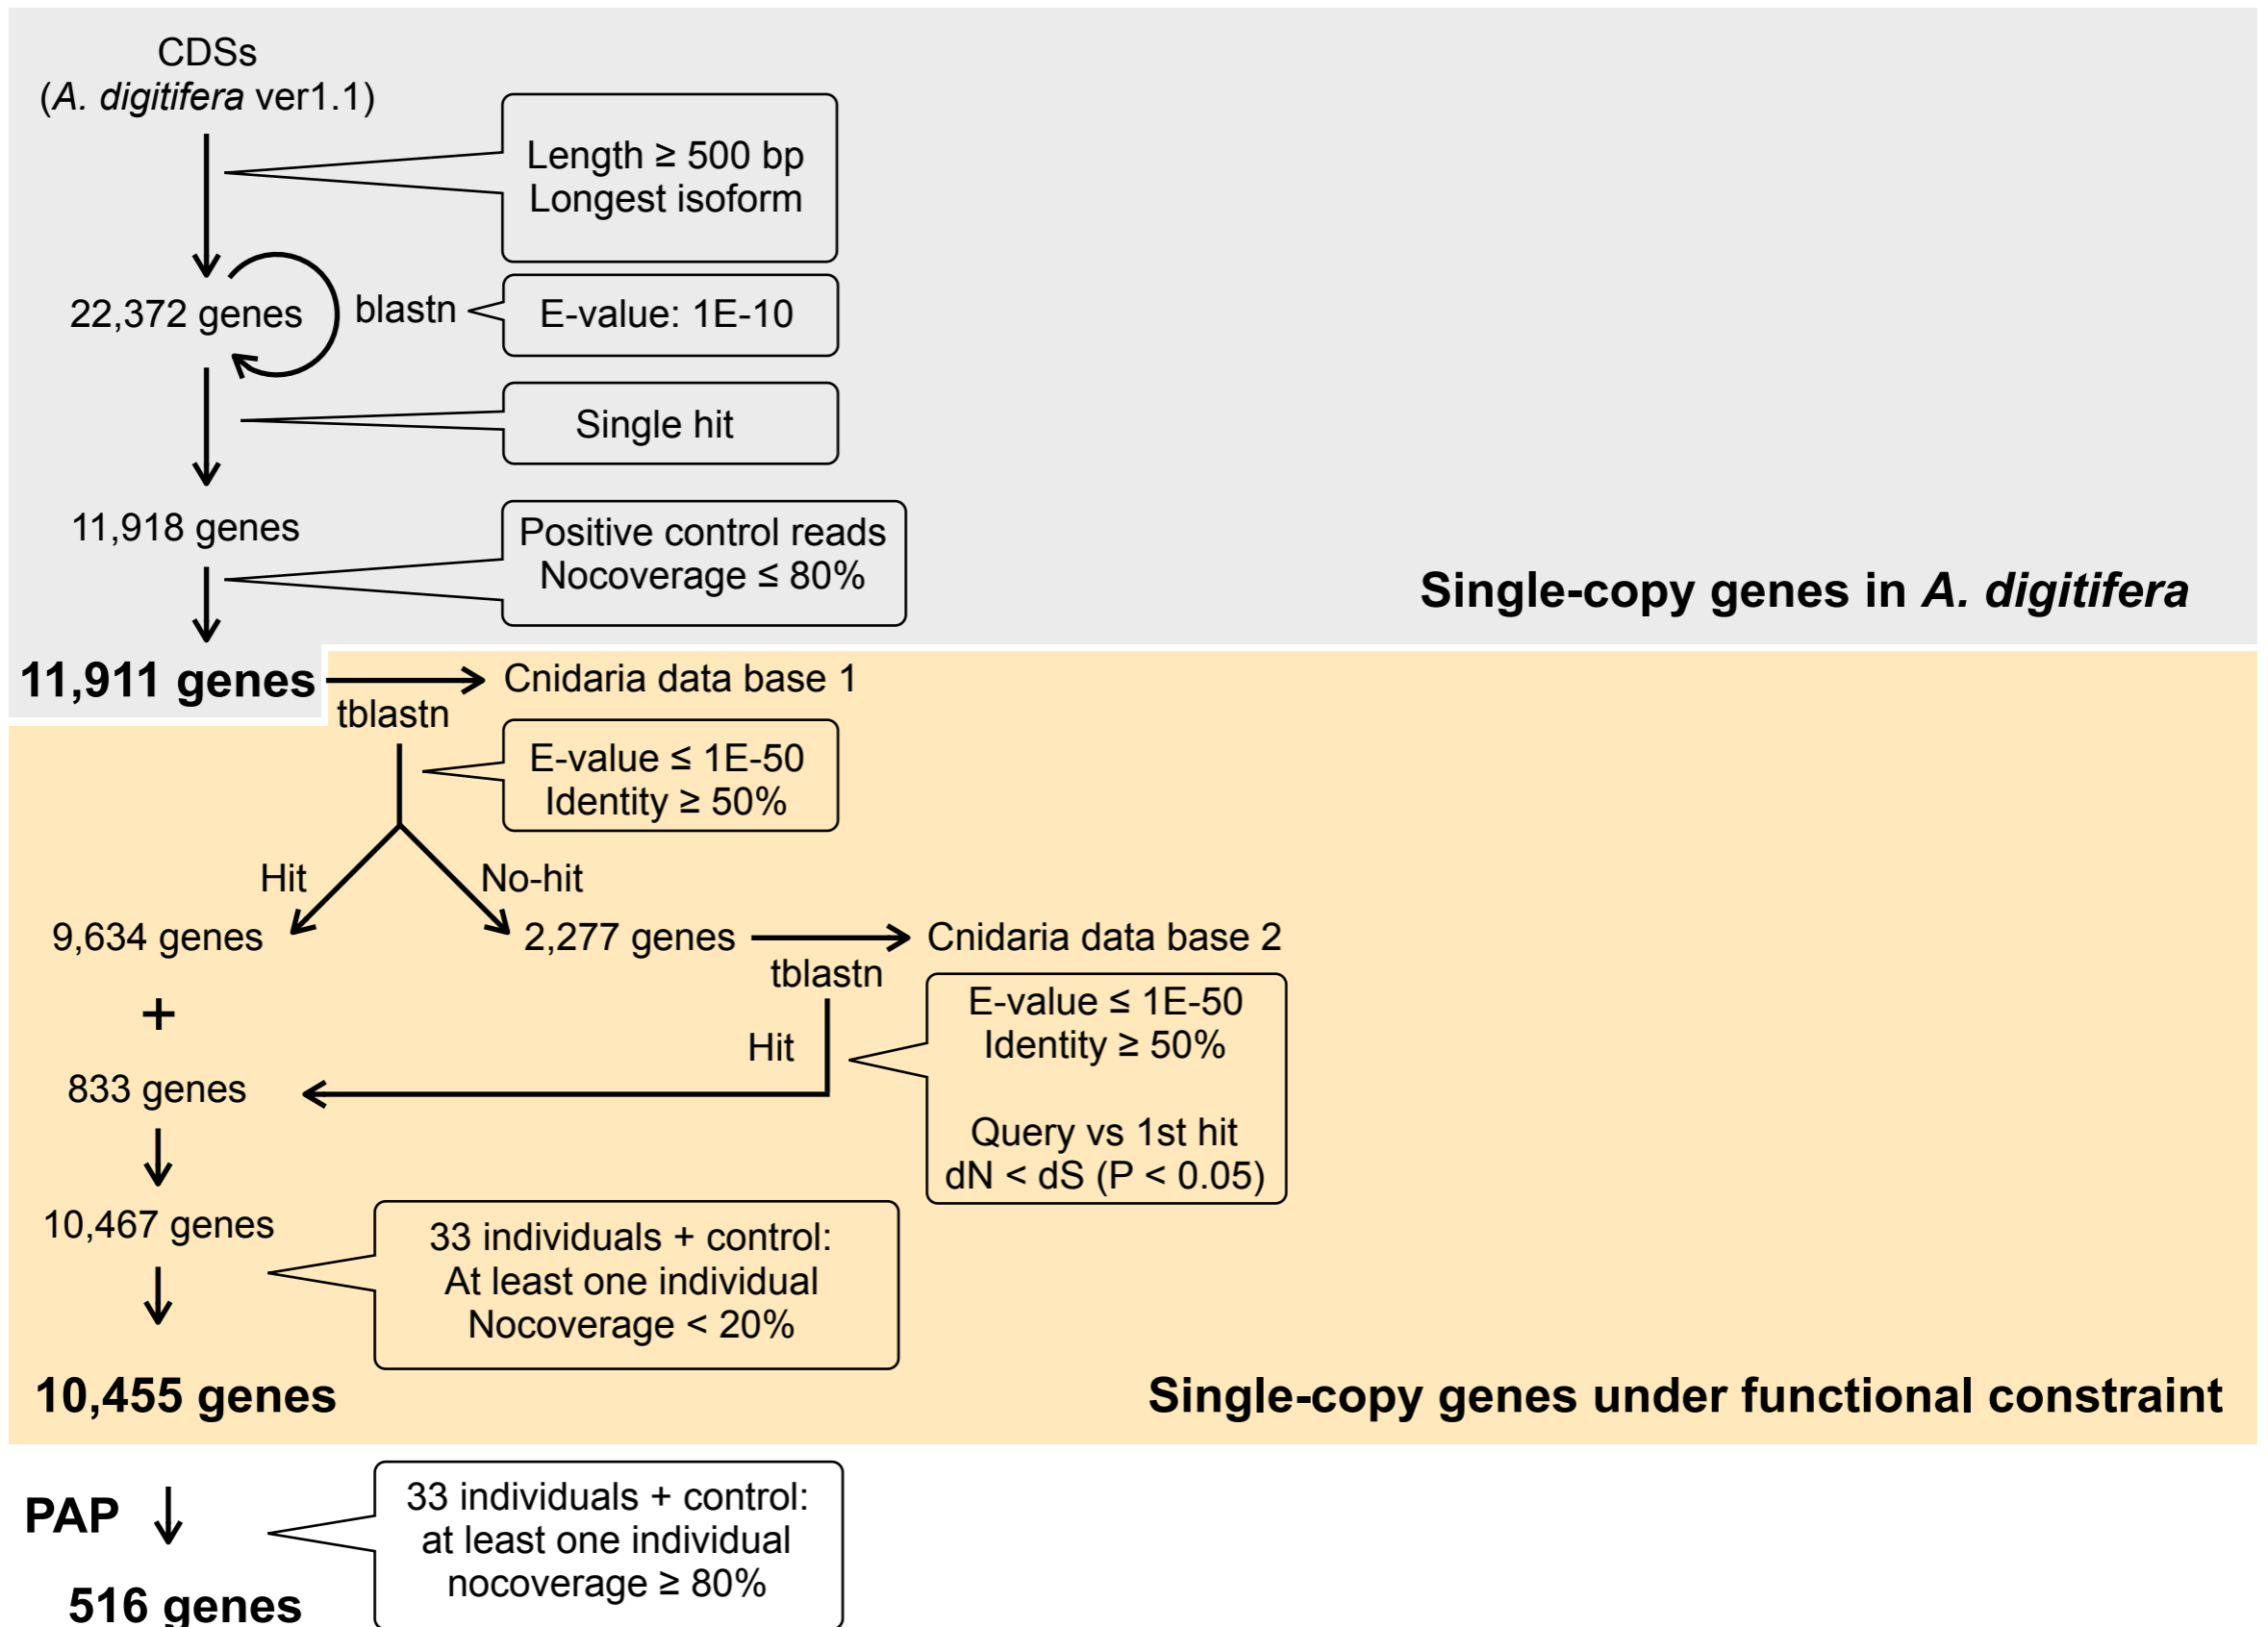

Figure S6. The schematic representation of identification of single-copy genes under functional constraint.

# Table S1

**Table S1.** Overview of high-throughput sequencing

| Sample ID | Species              | Source      | Accession number | Total reads | Mapped reads (%) | Average coverage (CDS paired read only) |
|-----------|----------------------|-------------|------------------|-------------|------------------|-----------------------------------------|
| S1601     | <i>A. digitifera</i> | genomic DNA | DRR108003*       | 91,827,028  | 68.0             | 16.9                                    |
| S1602     | <i>A. digitifera</i> | genomic DNA | DRR108004*       | 38,251,050  | 76.1             | 6.4                                     |
| S1603     | <i>A. digitifera</i> | genomic DNA | DRR108005*       | 89,613,452  | 66.3             | 16.5                                    |
| S1604     | <i>A. digitifera</i> | genomic DNA | DRR108006*       | 43,717,968  | 76.4             | 7.3                                     |
| S1605     | <i>A. digitifera</i> | genomic DNA | DRR108007*       | 42,246,308  | 75.4             | 6.8                                     |
| S1606     | <i>A. digitifera</i> | genomic DNA | DRR108008*       | 92,762,540  | 69.1             | 17.6                                    |
| S1607     | <i>A. digitifera</i> | genomic DNA | DRR108009*       | 36,664,662  | 76.4             | 6.3                                     |
| S1608     | <i>A. digitifera</i> | genomic DNA | DRR108010*       | 34,580,790  | 73.4             | 5.5                                     |
| S1610     | <i>A. digitifera</i> | genomic DNA | DRR108024*       | 42,615,662  | 77.2             | 7.5                                     |
| S1611     | <i>A. digitifera</i> | genomic DNA | DRR108011*       | 40,117,898  | 76.6             | 6.7                                     |
| S1612     | <i>A. digitifera</i> | genomic DNA | DRR108012*       | 35,147,552  | 75.3             | 5.7                                     |
| T3        | <i>A. tenuis</i>     | genomic DNA | DRR110778        | 74,177,804  | 69.0             | 19.9                                    |
| T4        | <i>A. tenuis</i>     | genomic DNA | DRR110779        | 79,726,028  | 68.8             | 21.4                                    |
| T5        | <i>A. tenuis</i>     | genomic DNA | DRR110780        | 65,492,982  | 68.9             | 17.6                                    |
| T8        | <i>A. tenuis</i>     | genomic DNA | DRR110781        | 74,726,820  | 68.5             | 20.1                                    |
| T9        | <i>A. tenuis</i>     | genomic DNA | DRR110782        | 81,311,224  | 68.8             | 21.6                                    |
| T10       | <i>A. tenuis</i>     | genomic DNA | DRR110783        | 84,059,950  | 68.8             | 22.5                                    |
| S1601     | <i>A. digitifera</i> | RNA         | DRR108013*       | 75,591,730  | 43.5             | -                                       |
| S1603     | <i>A. digitifera</i> | RNA         | DRR108015*       | 53,761,100  | 40.1             | -                                       |
| S1606     | <i>A. digitifera</i> | RNA         | DRR108018*       | 62,627,534  | 43.7             | -                                       |
| -         | <i>A. digitifera</i> | RNA         | SRX1534820**     | 97,170,470  | 81.8             | -                                       |

\*from Takahashi-Kariyazono *et al.* 2018, \*\*from Mohamed AR *et al.* 2016 (see reference)

# Table S2

Table S2. Gene IDs and descriptions of PAP genes identified in 33 *A. digitifera*

| Gene ID       | Description                                                                                         | Expression | TE |
|---------------|-----------------------------------------------------------------------------------------------------|------------|----|
| LOC107326866  | PREDICTED: uncharacterized protein LOC107326866                                                     | -          | -  |
| LOC107326875  | E3ubiquitin-proteinligaseTRAIIP-like                                                                | Expressed  | -  |
| LOC107326878  | Werner syndrome ATP-dependent helicase homolog                                                      | -          | -  |
| LOC107326879  | Transposon Tf2-6 poly                                                                               | Expressed  | TE |
| LOC107326880  | PREDICTED: uncharacterized protein LOC107326880                                                     | Expressed  | -  |
| LOC107326882  | PREDICTED: uncharacterized protein LOC107326882                                                     | Expressed  | -  |
| LOC107326911  | uncharacterizedproteinK02A2.6-like                                                                  | -          | -  |
| LOC107326977  | ATP-dependent DNA helicase -like                                                                    | -          | -  |
| LOC107327031  | RNA-directed DNA polymerase homolog                                                                 | -          | TE |
| LOC107327207  | uncharacterizedproteinLOC107327207                                                                  | Expressed  | -  |
| LOC107327264  | PREDICTED: uncharacterized protein LOC107327264                                                     | -          | -  |
| LOC107327277  | BTBandMATHdomain-containingprotein38-like                                                           | Expressed  | -  |
| LOC107327284  | PREDICTED:uncharacterized LOC107327284mRNA                                                          | Expressed  | -  |
| LOC107327381  | PREDICTED: uncharacterized protein LOC107327381                                                     | -          | -  |
| LOC107327384  | PREDICTED: uncharacterized protein LOC107327384                                                     | -          | -  |
| LOC107327386  | ATP-dependent helicase SGS1-like                                                                    | Expressed  | -  |
| LOC107327399  | nuclease HARBI1                                                                                     | -          | -  |
| LOC107327401  | adenosine receptor A2b-like                                                                         | Expressed  | -  |
| LOC107327549  | PREDICTED: uncharacterized protein K02A2.6-like                                                     | Expressed  | -  |
| LOC107327591  | nuclease HARBI1                                                                                     | -          | -  |
| LOC107327607  | coiled-coil domain-containing 82-like                                                               | -          | -  |
| LOC107327666  | nucleoporin GLE1-like                                                                               | -          | -  |
| LOC107327668  | PREDICTED: uncharacterized protein LOC107327668                                                     | -          | -  |
| LOC107327737  | Retrovirus-related Pol poly from transposon                                                         | -          | TE |
| LOC107327738  | sporulation kinase mde3-like [Orbicella faveolata]                                                  | -          | -  |
| LOC107327743  | PREDICTED: uncharacterized protein LOC107327743                                                     | -          | -  |
| LOC107327916  | PREDICTED: uncharacterized protein LOC107327916                                                     | -          | -  |
| LOC107327920  | heat shock 70 kDa 12A-like                                                                          | Expressed  | -  |
| LOC107327921  | CAP-Gly domain-containing linker 1-like isoform X2                                                  | Expressed  | -  |
| LOC107327922  | CAP-Gly domain-containing linker 1-like isoform X2                                                  | Expressed  | -  |
| LOC107328052  | Transposable element P transposase                                                                  | -          | TE |
| LOC107328072  | PREDICTED: uncharacterized protein LOC107328072                                                     | Expressed  | -  |
| LOC107328111  | PREDICTED: uncharacterized protein LOC107328111                                                     | Expressed  | -  |
| LOC107328136  | RNA-directed DNA polymerase from mobile element jockey-like                                         | -          | TE |
| LOC107328140  | PREDICTED: uncharacterized protein LOC107328140                                                     | -          | -  |
| LOC107328262  | uncharacterizedproteinLOC107328262                                                                  | -          | -  |
| LOC107328282  | PREDICTED: uncharacterized protein LOC107328282                                                     | -          | -  |
| LOC107328296  | myb X                                                                                               | Expressed  | -  |
| LOC107328301  | PREDICTED: uncharacterized protein LOC107328301                                                     | -          | -  |
| LOC107328359  | receptor-type tyrosine- phosphatase F-like isoform X18                                              | -          | -  |
| LOC107328442  | PREDICTED: uncharacterized protein K02A2.6-like                                                     | -          | -  |
| LOC107328474  | PREDICTED: uncharacterized protein LOC107328474                                                     | -          | -  |
| LOC107328478  | PREDICTED: uncharacterized protein LOC107328478                                                     | -          | -  |
| LOC107328498  | PREDICTED: LOW QUALITY PROTEIN: trichohyalin-like                                                   | -          | -  |
| LOC107328547  | PREDICTED: uncharacterized protein LOC107328547                                                     | -          | -  |
| LOC107328549  | PREDICTED: uncharacterized protein LOC107328549                                                     | -          | -  |
| LOC107328551  | PREDICTED: uncharacterized protein LOC107328551                                                     | -          | -  |
| LOC107328574  | PREDICTED: uncharacterized protein LOC107328574                                                     | -          | -  |
| LOC107328613  | uncharacterizedproteinLOC107328613                                                                  | Expressed  | -  |
| LOC107328615* | venom prothrombin activator pseutarin-C non-catalytic subunit-like isoform X1 [Orbicella faveolata] | -          | -  |
| LOC107328665  | nuclease HARBI1                                                                                     | -          | -  |
| LOC107328693  | PREDICTED: uncharacterized protein LOC107328693                                                     | Expressed  | -  |
| LOC107328703  | ATP-dependent DNA helicase -like                                                                    | -          | -  |
| LOC107328777  | ATP-dependent DNA helicase PIF1                                                                     | -          | -  |
| LOC107328778  | PREDICTED: uncharacterized protein LOC107328778                                                     | -          | -  |
| LOC107328831  | nuclease HARBI1                                                                                     | -          | -  |
| LOC107328899* | DELTA-alicitoxin-Pse2b-like [Orbicella faveolata]                                                   | Expressed  | -  |
| LOC107328915  | PREDICTED: uncharacterized protein LOC107328915 isoform X1                                          | -          | -  |
| LOC107328985  | roundabout homolog 1-like                                                                           | Expressed  | -  |
| LOC107329014  | uncharacterizedproteinLOC107329014isoformX1                                                         | -          | -  |
| LOC107329017  | PREDICTED: uncharacterized protein LOC107329017                                                     | Expressed  | -  |
| LOC107329092  | acid phosphatase type 7-like                                                                        | Expressed  | -  |
| LOC107329116  | PREDICTED: uncharacterized protein LOC107329116                                                     | -          | -  |
| LOC107329124  | PREDICTED: uncharacterized protein LOC107329124                                                     | Expressed  | -  |
| LOC107329127  | tiggertransposableelement-derivedprotein4-like                                                      | -          | TE |
| LOC107329135  | PREDICTED: uncharacterized protein LOC107329135                                                     | Expressed  | -  |
| LOC107329217  | PREDICTED: uncharacterized protein LOC107329217                                                     | Expressed  | -  |
| LOC107329253  | RNA-directed DNA polymerase from mobile element jockey-like                                         | -          | TE |
| LOC107329270  | PREDICTED: uncharacterized protein LOC107329270                                                     | Expressed  | -  |
| LOC107329282  | bromodomain adjacent to zinc finger domain 2B-like                                                  | Expressed  | -  |
| LOC107329369  | probable RNA-dependent RNA polymerase 1                                                             | -          | -  |
| LOC107329412  | PREDICTED: uncharacterized protein LOC107329412                                                     | Expressed  | -  |
| LOC107329498  | nuclease HARBI1                                                                                     | -          | -  |
| LOC107329567  | PREDICTED: uncharacterized protein LOC107329567                                                     | Expressed  | -  |
| LOC107329587  | PREDICTED: uncharacterized protein LOC107329587                                                     | -          | -  |
| LOC107329677  | fibroblast growth factor receptor homolog 1-like                                                    | Expressed  | -  |
| LOC107329697  | uncharacterizedproteinLOC107329697                                                                  | Expressed  | -  |
| LOC107329738  | PREDICTED: uncharacterized protein LOC107329738                                                     | Expressed  | -  |
| LOC107329778  | PREDICTED: uncharacterized protein LOC107329778                                                     | Expressed  | -  |
| LOC107329779  | PREDICTED: uncharacterized protein LOC107329779                                                     | -          | -  |
| LOC107329813  | PREDICTED: uncharacterized protein LOC107329813                                                     | Expressed  | -  |
| LOC107329830  | PREDICTED: uncharacterized protein LOC107329830                                                     | Expressed  | -  |
| LOC107329831  | PREDICTED: uncharacterized protein LOC107329831                                                     | Expressed  | -  |
| LOC107329867  | PREDICTED: uncharacterized protein K02A2.6-like                                                     | -          | -  |
| LOC107329883  | piggyBac transposable element-derived 4-like                                                        | -          | TE |
| LOC107329926  | centrosomal of 89 kDa-like                                                                          | Expressed  | -  |
| LOC107329943  | Inhibitor of growth 3                                                                               | -          | -  |
| LOC107329960  | isovaleryl- mitochondrial                                                                           | Expressed  | -  |
| LOC107329961  | ATP-dependent DNA helicase PIF1                                                                     | -          | -  |
| LOC107329971  | craniofacial development 2-like                                                                     | -          | -  |
| LOC107330022  | zinc finger 862-like                                                                                | Expressed  | -  |
| LOC107330150  | PREDICTED: LOW QUALITY PROTEIN: uncharacterized protein LOC107330150, partial                       | -          | -  |
| LOC107330260  | PREDICTED: uncharacterized protein LOC107330260                                                     | Expressed  | -  |
| LOC107330321  | PREDICTED: uncharacterized protein LOC107330321 isoform X1                                          | Expressed  | -  |

Table S2 (continued)

| Gene ID      | Description                                                                 | Expression | TE |
|--------------|-----------------------------------------------------------------------------|------------|----|
| LOC107330360 | PREDICTED: uncharacterized protein LOC107330360                             | -          | -  |
| LOC107330433 | growth hormone secretagogue receptor type 1-like                            | Expressed  | -  |
| LOC107330437 | Cytosolic non-specific dipeptidase                                          | Expressed  | -  |
| LOC107330455 | disintegrin and metallo ase domain-containing 15-like                       | Expressed  | -  |
| LOC107330533 | PREDICTED: uncharacterized protein LOC107330533                             | -          | -  |
| LOC107330537 | ATP-dependent DNA helicase PIF1-like                                        | -          | -  |
| LOC107330545 | arf-GAP with coiled- ANK repeat and PH domain-containing 2-                 | Expressed  | -  |
| LOC107330582 | nuclease HARBI1                                                             | Expressed  | -  |
| LOC107330631 | Kinesin light chain                                                         | -          | -  |
| LOC107330707 | uncharacterized kDa in hlyA 3 region-like                                   | Expressed  | -  |
| LOC107330713 | lecithin retinol acyltransferase family                                     | Expressed  | -  |
| LOC107330780 | PREDICTED: uncharacterized protein LOC107330780                             | -          | -  |
| LOC107330786 | zinc finger MYM-type 1-like                                                 | -          | -  |
| LOC107330925 | substance-P receptor-like [Orbicella faveolata]                             | Expressed  | -  |
| LOC107331191 | PREDICTED: uncharacterized protein LOC107331191                             | Expressed  | -  |
| LOC107331279 | uncharacterizedproteinLOC107331279                                          | Expressed  | -  |
| LOC107331400 | PREDICTED: uncharacterized protein LOC107331400                             | -          | -  |
| LOC107331438 | nuclease HARBI1                                                             | Expressed  | -  |
| LOC107331603 | PREDICTED: uncharacterized protein LOC107331603 isoform X1                  | Expressed  | -  |
| LOC107331790 | PREDICTED: uncharacterized protein LOC107331790                             | Expressed  | -  |
| LOC107331818 | uncharacterizedproteinLOC107331818                                          | -          | -  |
| LOC107331871 | uncharacterizedproteinLOC107331871                                          | Expressed  | -  |
| LOC107332035 | PREDICTED: uncharacterized protein LOC107332035                             | Expressed  | -  |
| LOC107332059 | sporulation kinase mde3-like [Orbicella faveolata]                          | -          | -  |
| LOC107332154 | PREDICTED: uncharacterized protein LOC107332154                             | Expressed  | -  |
| LOC107332253 | piggyBac transposable element-derived 4-like                                | -          | TE |
| LOC107332262 | uncharacterizedproteinLOC107332262                                          | Expressed  | -  |
| LOC107332275 | PREDICTED: uncharacterized protein LOC107332275 isoform X1                  | -          | -  |
| LOC107332276 | PREDICTED: uncharacterized protein LOC107332276                             | Expressed  | -  |
| LOC107332277 | THAP domain-containing 2                                                    | -          | -  |
| LOC107332295 | PREDICTED: uncharacterized protein LOC107332295                             | -          | -  |
| LOC107332428 | neurogenic locus notch homolog 2-like                                       | Expressed  | -  |
| LOC107332449 | PREDICTED: uncharacterized protein LOC107332449 isoform X1                  | -          | -  |
| LOC107332451 | PREDICTED: uncharacterized protein LOC107332451                             | Expressed  | -  |
| LOC107332493 | low-density lipo receptor-related 4-like isoform X1 [Orbicella faveolata]   | Expressed  | -  |
| LOC107332543 | synaptonemal complex 2-like                                                 | -          | -  |
| LOC107332563 | dyneinheavychain7 2Caxonemal-like                                           | -          | -  |
| LOC107332687 | PREDICTED: uncharacterized protein LOC107332687                             | -          | -  |
| LOC107332709 | FAR1-RELATED SEQUENCE 7                                                     | Expressed  | -  |
| LOC107332772 | basic proline-rich -like                                                    | -          | -  |
| LOC107332832 | PREDICTED: uncharacterized protein LOC107332832                             | -          | -  |
| LOC107332848 | PREDICTED: uncharacterized protein LOC107332848                             | Expressed  | -  |
| LOC107333229 | PREDICTED: uncharacterized protein LOC107333229 isoform X1                  | Expressed  | -  |
| LOC107333440 | ubiquitin-ribosomal 60S subunit L40B fusion                                 | Expressed  | -  |
| LOC107333546 | exonuclease R569                                                            | Expressed  | -  |
| LOC107333553 | PREDICTED: uncharacterized protein LOC107333553                             | -          | -  |
| LOC107333568 | ankyrin repeat                                                              | Expressed  | -  |
| LOC107333805 | PREDICTED: uncharacterized protein LOC107333805                             | -          | -  |
| LOC107334028 | mab-21-like 3                                                               | Expressed  | -  |
| LOC107334104 | PREDICTED: LOW QUALITY PROTEIN: uncharacterized protein LOC107334104        | -          | -  |
| LOC107334110 | nuclease HARBI1                                                             | -          | -  |
| LOC107334120 | PREDICTED: uncharacterized protein LOC107334120                             | -          | -  |
| LOC107334122 | nuclease HARBI1                                                             | -          | -  |
| LOC107334256 | aspartyl asparaginyl beta-hydroxylase-like                                  | Expressed  | -  |
| LOC107334257 | FAD-linked oxidoreductase DDB_G0289697-like [Orbicella faveolata]           | Expressed  | -  |
| LOC107334258 | PREDICTED: uncharacterized protein LOC107334258                             | Expressed  | -  |
| LOC107334388 | neuropeptide FF receptor 2-like isoform X1                                  | Expressed  | -  |
| LOC107334677 | PREDICTED: uncharacterized protein LOC107334677                             | -          | -  |
| LOC107334724 | PREDICTED: uncharacterized protein LOC107334724                             | Expressed  | -  |
| LOC107334853 | choline dehydrogenase                                                       | Expressed  | -  |
| LOC107334884 | PREDICTED: uncharacterized protein LOC107334884                             | -          | -  |
| LOC107334901 | cholesterol oxidase-like isoform X2                                         | Expressed  | -  |
| LOC107334940 | PREDICTED: uncharacterized protein LOC107334940                             | -          | -  |
| LOC107335089 | PREDICTED: uncharacterized protein LOC107335089                             | Expressed  | -  |
| LOC107335101 | RNA-directed DNA polymerase homolog                                         | -          | TE |
| LOC107335105 | RNA-directed DNA polymerase from mobile element jockey-like                 | -          | TE |
| LOC107335135 | ATP-dependent DNA helicase PIF7-like                                        | -          | -  |
| LOC107335145 | PREDICTED: uncharacterized protein LOC107335145 isoform X1                  | Expressed  | -  |
| LOC107335263 | uncharacterizedproteinLOC107335263                                          | -          | -  |
| LOC107335266 | Retrovirus-related Pol poly from transposon TNT 1-94                        | -          | TE |
| LOC107335269 | PREDICTED: uncharacterized protein LOC107335269                             | Expressed  | -  |
| LOC107335681 | PREDICTED: uncharacterized protein LOC107335681                             | Expressed  | -  |
| LOC107335928 | zinc finger 397-like                                                        | -          | -  |
| LOC107336168 | uncharacterizedproteinLOC107336168                                          | -          | -  |
| LOC107336333 | PREDICTED: uncharacterized protein LOC107336333                             | -          | -  |
| LOC107336339 | collagen alpha-1(VII) chain-like                                            | Expressed  | -  |
| LOC107336429 | G2 M phase-specific E3 ubiquitin- ligase-like                               | -          | -  |
| LOC107336430 | G2 M phase-specific E3 ubiquitin- ligase-like                               | -          | -  |
| LOC107336432 | PREDICTED: uncharacterized protein LOC107336432                             | -          | -  |
| LOC107336581 | transmembrane matrix receptor MUP-4-like                                    | -          | -  |
| LOC107336621 | nuclease HARBI1                                                             | -          | -  |
| LOC107336631 | PREDICTED: uncharacterized protein LOC107336631                             | -          | -  |
| LOC107336737 | PREDICTED: uncharacterized protein LOC107336737                             | -          | -  |
| LOC107336915 | guanylate-binding 5-                                                        | Expressed  | -  |
| LOC107336916 | stress response NST1-like                                                   | Expressed  | -  |
| LOC107336931 | skeletalasparticacid-richprotein1-likeisoformX1                             | Expressed  | -  |
| LOC107337209 | PREDICTED: uncharacterized protein LOC107337209                             | -          | -  |
| LOC107337338 | PREDICTED: uncharacterized protein LOC107337338                             | Expressed  | -  |
| LOC107337384 | tetratricopeptide repeat 28-like                                            | Expressed  | -  |
| LOC107337721 | Integrase recombinase xerD-                                                 | -          | -  |
| LOC107337834 | PREDICTED: uncharacterized protein LOC107337834                             | -          | -  |
| LOC107337889 | glomulin-likeisoformX1                                                      | Expressed  | -  |
| LOC107338030 | PREDICTED: uncharacterized protein K02A2.6-like                             | -          | -  |
| LOC107338045 | uncharacterizedproteinLOC107338045                                          | -          | -  |
| LOC107338067 | peptide-N(4)-(N-acetyl-beta-glucosaminyl)asparagine amidase-like isoform X2 | Expressed  | -  |
| LOC107338192 | ras-related Rab-1A                                                          | Expressed  | -  |

Table S2 (continued)

| Gene ID      | Description                                                           | Expression | TE |
|--------------|-----------------------------------------------------------------------|------------|----|
| LOC107338236 | PREDICTED: uncharacterized protein LOC107338236                       | -          | -  |
| LOC107338274 | PREDICTED: uncharacterized protein LOC107338274                       | Expressed  | -  |
| LOC107338306 | PREDICTED: uncharacterized protein LOC107338306                       | Expressed  | -  |
| LOC107338342 | PREDICTED: uncharacterized protein LOC107338342                       | -          | -  |
| LOC107338483 | PREDICTED: LOW QUALITY PROTEIN: uncharacterized protein LOC107338483  | -          | -  |
| LOC107338516 | PREDICTED: uncharacterized protein LOC107338516                       | Expressed  | -  |
| LOC107338524 | PREDICTED: uncharacterized protein LOC107338524                       | Expressed  | -  |
| LOC107338582 | steroid receptor RNA activator 1-like                                 | Expressed  | -  |
| LOC107338602 | RNA-directed DNA polymerase                                           | -          | TE |
| LOC107338605 | PREDICTED: uncharacterized protein LOC107338605                       | -          | -  |
| LOC107338638 | CD63 antigen-like                                                     | Expressed  | -  |
| LOC107338652 | uncharacterized protein LOC107338652                                  | Expressed  | -  |
| LOC107338654 | PREDICTED: uncharacterized protein K02A2.6-like                       | Expressed  | -  |
| LOC107338670 | TNF receptor-associated factor 5-like                                 | Expressed  | -  |
| LOC107338680 | PREDICTED: tyrosinase-like                                            | Expressed  | -  |
| LOC107338684 | ANTAGONIST OF LIKE HETEROCHROMATIN PROTEIN 1-like                     | -          | -  |
| LOC107338701 | PREDICTED: LOW QUALITY PROTEIN: uncharacterized protein LOC107338701  | -          | -  |
| LOC107338713 | PREDICTED: uncharacterized protein LOC107338713                       | Expressed  | -  |
| LOC107338752 | CGG triplet repeat-binding 1                                          | -          | -  |
| LOC107338878 | PREDICTED: uncharacterized protein LOC107338878                       | Expressed  | -  |
| LOC107338885 | sodium-dependent phosphate transport 2B-like                          | Expressed  | -  |
| LOC107339264 | PREDICTED: uncharacterized protein LOC107339264                       | -          | -  |
| LOC107339283 | ATP-dependent DNA helicase PIF1                                       | -          | -  |
| LOC107339284 | ATP-dependent DNA helicase PIF1                                       | Expressed  | -  |
| LOC107339341 | Stage V sporulation K                                                 | -          | -  |
| LOC107339442 | microfibril-associated glyco 4-like isoform X1                        | Expressed  | -  |
| LOC107339630 | RNA-directed DNA polymerase from mobile element jockey-like           | -          | TE |
| LOC107339661 | PREDICTED: LOW QUALITY PROTEIN: uncharacterized protein LOC107339661  | Expressed  | -  |
| LOC107339671 | calcium-dependent kinase 1-like                                       | Expressed  | -  |
| LOC107339686 | G2 M phase-specific E3 ubiquitin- ligase                              | Expressed  | -  |
| LOC107339752 | alpha-amylase 2-like                                                  | Expressed  | -  |
| LOC107339909 | PREDICTED: uncharacterized protein LOC107339909                       | -          | -  |
| LOC107339967 | PREDICTED: uncharacterized protein LOC107339967                       | -          | -  |
| LOC107340000 | PREDICTED: uncharacterized protein LOC107340000                       | -          | -  |
| LOC107340010 | PREDICTED: uncharacterized protein LOC107340010                       | -          | -  |
| LOC107340011 | PREDICTED: uncharacterized protein LOC107340011                       | -          | -  |
| LOC107340150 | PREDICTED: uncharacterized protein LOC107340150                       | -          | -  |
| LOC107340242 | PREDICTED: uncharacterized protein LOC107340242                       | Expressed  | -  |
| LOC107340281 | polyubiquitin 8-like                                                  | Expressed  | -  |
| LOC107340308 | PREDICTED: uncharacterized protein LOC107340308                       | -          | -  |
| LOC107340343 | PREDICTED: uncharacterized protein LOC107340343                       | Expressed  | -  |
| LOC107340344 | PREDICTED: uncharacterized protein LOC107340344                       | -          | -  |
| LOC107340345 | PREDICTED: uncharacterized protein LOC107340345 isoform X1            | Expressed  | -  |
| LOC107340388 | PREDICTED: uncharacterized protein LOC107340388                       | Expressed  | -  |
| LOC107340631 | PREDICTED: uncharacterized protein LOC107340631                       | -          | -  |
| LOC107340632 | PREDICTED: uncharacterized protein LOC107340632                       | -          | -  |
| LOC107340680 | RNA-directed DNA polymerase from transposon X-element                 | -          | TE |
| LOC107340732 | fibroblast growth factor receptor homolog 1-like                      | Expressed  | -  |
| LOC107340786 | tiggertransposableelement-derived protein 6-like                      | -          | TE |
| LOC107340856 | PREDICTED: uncharacterized protein LOC107340856                       | Expressed  | -  |
| LOC107341130 | fibropellin-1-like isoform X2                                         | Expressed  | -  |
| LOC107341260 | PREDICTED: uncharacterized protein LOC107341260                       | Expressed  | -  |
| LOC107341356 | RNA-directed DNA polymerase from mobile element jockey                | -          | TE |
| LOC107341426 | PREDICTED: uncharacterized protein LOC107341426                       | Expressed  | -  |
| LOC107341702 | PREDICTED: uncharacterized protein LOC107341702                       | -          | -  |
| LOC107341741 | PREDICTED: uncharacterized protein LOC107341741                       | -          | -  |
| LOC107341742 | uncharacterized protein LOC107341742                                  | Expressed  | -  |
| LOC107341785 | PREDICTED: uncharacterized protein LOC107341785                       | Expressed  | -  |
| LOC107341895 | uncharacterized protein LOC107341895                                  | Expressed  | -  |
| LOC107341939 | transient receptor potential cation channel subfamily M member 6-like | -          | -  |
| LOC107341940 | PREDICTED: uncharacterized protein LOC107341940                       | -          | -  |
| LOC107342004 | PREDICTED: uncharacterized protein LOC107342004                       | -          | -  |
| LOC107342055 | ATP-dependent DNA helicase                                            | Expressed  | -  |
| LOC107342088 | P2X purinoceptor 7-like                                               | Expressed  | -  |
| LOC107342111 | PREDICTED: uncharacterized protein LOC107342111                       | Expressed  | -  |
| LOC107342128 | PREDICTED: uncharacterized protein LOC107342128                       | Expressed  | -  |
| LOC107342140 | von Willebrand factor D and EGF domain-containing -like               | Expressed  | -  |
| LOC107342212 | EF-hand calcium-binding domain-containing 11-like                     | Expressed  | -  |
| LOC107342327 | PREDICTED: uncharacterized protein LOC107342327                       | Expressed  | -  |
| LOC107342364 | calponin homology domain-containing DDB_G0272472-like                 | -          | -  |
| LOC107342607 | PREDICTED: uncharacterized protein LOC107342607                       | Expressed  | -  |
| LOC107342650 | PREDICTED: uncharacterized protein LOC107342650                       | -          | -  |
| LOC107342652 | PREDICTED: uncharacterized protein LOC107342652                       | Expressed  | -  |
| LOC107342667 | PREDICTED: uncharacterized protein LOC107342667                       | -          | -  |
| LOC107342698 | E3 ubiquitin- ligase TRIM71-like                                      | Expressed  | -  |
| LOC107342908 | PREDICTED: uncharacterized protein LOC107342908 isoform X1            | Expressed  | -  |
| LOC107342909 | nuclease HARBI1                                                       | Expressed  | -  |
| LOC107343191 | unc-13 homolog C-like                                                 | -          | -  |
| LOC107343213 | PREDICTED: uncharacterized protein LOC107343213                       | -          | -  |
| LOC107343217 | PREDICTED: uncharacterized protein LOC107343217                       | -          | -  |
| LOC107343293 | PREDICTED: uncharacterized protein LOC107343293                       | -          | -  |
| LOC107343318 | uncharacterized protein LOC107343318                                  | Expressed  | -  |
| LOC107343320 | 52 kDa repressor of the inhibitor of the kinase-like                  | Expressed  | -  |
| LOC107343351 | calcitonin receptor-like                                              | Expressed  | -  |
| LOC107343414 | X-prolyl aminopeptidase                                               | Expressed  | -  |
| LOC107343550 | PREDICTED: uncharacterized protein LOC107343550                       | Expressed  | -  |
| LOC107343551 | PREDICTED: uncharacterized protein LOC107343551 isoform X1            | Expressed  | -  |
| LOC107343583 | PREDICTED: uncharacterized protein LOC107343583 isoform X1            | Expressed  | -  |
| LOC107343786 | PREDICTED: uncharacterized protein LOC107343786                       | Expressed  | -  |
| LOC107344006 | zinc finger and SCAN domain-containing 29-like                        | -          | -  |
| LOC107344088 | PREDICTED: mucin-like protein                                         | Expressed  | -  |
| LOC107344292 | PREDICTED: uncharacterized protein LOC107344292                       | -          | -  |
| LOC107344307 | uncharacterized protein LOC107344307                                  | Expressed  | -  |
| LOC107344312 | PREDICTED: uncharacterized protein LOC107344312                       | Expressed  | -  |
| LOC107344361 | PREDICTED: uncharacterized protein LOC107344361                       | -          | -  |
| LOC107344365 | rasGEF domain-containing serine threonine- kinase X-like              | Expressed  | -  |

Table S2 (continued)

| Gene ID       | Description                                                  | Expression | TE |
|---------------|--------------------------------------------------------------|------------|----|
| LOC107344473  | E3 ubiquitin- ligase RNF213-like                             | -          | -  |
| LOC107344506  | serine-rich adhesin for platelets-like                       | Expressed  | -  |
| LOC107344534  | RNA polymerase II-associated 3-like                          | Expressed  | TE |
| LOC107344544  | ATP-binding cassette sub-family B member mitochondrial       | -          | -  |
| LOC107344698  | RNA-directed DNA polymerase from transposon BS               | -          | TE |
| LOC107344717  | PREDICTED: uncharacterized protein LOC107344717              | Expressed  | -  |
| LOC107344722  | PREDICTED: uncharacterized protein K02A2.6-like              | -          | -  |
| LOC107344723  | PREDICTED: uncharacterized protein LOC107344723              | -          | -  |
| LOC107344948  | sterile alpha motif domain-containing 9-like                 | -          | -  |
| LOC107345000  | RNA-directed DNA polymerase from mobile element jockey-like  | -          | TE |
| LOC107345218  | piggyBac transposable element-derived 4-like                 | -          | TE |
| LOC107345281  | translationally-controlled tumor homolog                     | Expressed  | -  |
| LOC107345363  | von Willebrand factor A domain-containing 7-like             | Expressed  | -  |
| LOC107345370  | probable Werner syndrome ATP-dependent helicase homolog 1    | Expressed  | -  |
| LOC107345388  | PREDICTED: uncharacterized protein LOC107345388              | Expressed  | -  |
| LOC107345518  | N-lysine methyltransferase METTL21A-like                     | Expressed  | -  |
| LOC107345595  | PREDICTED: uncharacterized protein LOC107345595              | -          | -  |
| LOC107345652  | PREDICTED: uncharacterized protein LOC107345652              | Expressed  | -  |
| LOC107345686  | PREDICTED: uncharacterized protein LOC107345686              | Expressed  | -  |
| LOC107345821  | PREDICTED: uncharacterized protein LOC107345821              | Expressed  | -  |
| LOC107345859  | PREDICTED: uncharacterized protein LOC107345859              | -          | -  |
| LOC107345953  | PREDICTED: uncharacterized protein LOC107345953              | -          | -  |
| LOC107345954  | RNA-directed DNA polymerase from transposon BS               | -          | TE |
| LOC107346009  | PREDICTED: uncharacterized protein LOC107346009              | Expressed  | -  |
| LOC107346079  | uncharacterizedproteinLOC107346079                           | -          | -  |
| LOC107346195  | uncharacterizedproteinK02A2.6-like                           | -          | -  |
| LOC107346200  | PREDICTED: uncharacterized protein LOC107346200              | -          | -  |
| LOC107346201  | Retrovirus-related Pol poly from transposon                  | -          | TE |
| LOC107346222  | PREDICTED: uncharacterized protein LOC107346222              | Expressed  | -  |
| LOC107346245  | PREDICTED: uncharacterized protein LOC107346245              | Expressed  | -  |
| LOC107346322  | PREDICTED: uncharacterized protein LOC107346322              | Expressed  | -  |
| LOC107346547  | PREDICTED: uncharacterized protein LOC107346547              | Expressed  | -  |
| LOC107346734  | Transposon Ty3-I Gag-Pol poly                                | -          | TE |
| LOC107346746  | PREDICTED: uncharacterized protein LOC107346746              | -          | -  |
| LOC107346750  | PREDICTED: uncharacterized protein LOC107346750              | -          | -  |
| LOC107346751  | G2 M phase-specific E3 ubiquitin- ligase-like                | -          | -  |
| LOC107346839  | PREDICTED: uncharacterized protein LOC107346839              | Expressed  | -  |
| LOC107346953  | myb X                                                        | Expressed  | -  |
| LOC107346968  | General transcription factor II-I repeat domain-containing 1 | Expressed  | -  |
| LOC107347038  | PREDICTED: uncharacterized protein LOC107347038              | Expressed  | -  |
| LOC107347039  | nuclease HARBI1                                              | Expressed  | -  |
| LOC107347148  | PREDICTED: uncharacterized protein LOC107347148              | -          | -  |
| LOC107347149  | PREDICTED: uncharacterized protein LOC107347149              | Expressed  | -  |
| LOC107347179* | endothelin-converting enzyme 1-like                          | Expressed  | -  |
| LOC107347338  | integrase recombinase xerD homolog                           | Expressed  | -  |
| LOC107347354  | PREDICTED: uncharacterized protein LOC107347354              | -          | -  |
| LOC107347890  | uncharacterizedproteinLOC107347890                           | Expressed  | -  |
| LOC107347931  | poly [ADP-ribose] polymerase 14-like                         | Expressed  | -  |
| LOC107347932  | poly [ADP-ribose] polymerase 14-like                         | Expressed  | -  |
| LOC107348010  | PREDICTED: uncharacterized protein LOC107348010              | Expressed  | -  |
| LOC107348058  | PREDICTED: uncharacterized protein LOC107348058              | Expressed  | -  |
| LOC107348266  | ganglioside GM2 activator-like                               | Expressed  | -  |
| LOC107348297  | PREDICTED: uncharacterized protein LOC107348297 isoform X1   | Expressed  | -  |
| LOC107348302  | PREDICTED: uncharacterized protein LOC107348302              | -          | -  |
| LOC107348336  | uncharacterizedproteinLOC107348336                           | -          | -  |
| LOC107348470  | THAP domain-containing 6                                     | -          | -  |
| LOC107348471  | PREDICTED: uncharacterized protein LOC107348471              | -          | -  |
| LOC107348486  | PREDICTED: uncharacterized protein LOC107348486              | Expressed  | -  |
| LOC107348580  | PREDICTED: uncharacterized protein LOC107348580              | -          | -  |
| LOC107348583  | PREDICTED: uncharacterized protein LOC107348583              | -          | -  |
| LOC107348597  | PREDICTED: uncharacterized protein LOC107348597              | Expressed  | -  |
| LOC107348605  | uncharacterizedproteinLOC107348605isoformX1                  | Expressed  | -  |
| LOC107348755  | PREDICTED: uncharacterized protein K02A2.6-like              | -          | -  |
| LOC107348965  | integrase recombinase xerD homolog                           | -          | -  |
| LOC107348998  | PREDICTED: uncharacterized protein LOC107348998              | -          | -  |
| LOC107349000  | PREDICTED: uncharacterized protein LOC107349000              | -          | -  |
| LOC107349002  | PREDICTED: uncharacterized protein LOC107349002              | -          | -  |
| LOC107349040  | PREDICTED: uncharacterized protein LOC107349040              | -          | -  |
| LOC107349067  | zinc finger MYM-type 3-like                                  | -          | -  |
| LOC107349106  | BTB POZ domain-containing 6-like                             | -          | -  |
| LOC107349373  | PREDICTED: uncharacterized protein LOC107349373              | Expressed  | -  |
| LOC107349462  | PREDICTED: uncharacterized protein LOC107349462              | Expressed  | -  |
| LOC107349606  | PREDICTED: uncharacterized protein LOC107349606 isoform X1   | -          | -  |
| LOC107349624  | PREDICTED: uncharacterized protein LOC107349624              | Expressed  | -  |
| LOC107349625  | PREDICTED: uncharacterized protein LOC107349625              | -          | -  |
| LOC107349633  | PREDICTED: uncharacterized protein LOC107349633              | -          | -  |
| LOC107349901  | nuclease HARBI1                                              | Expressed  | -  |
| LOC107349932  | PREDICTED: uncharacterized protein LOC107349932              | Expressed  | -  |
| LOC107349944  | PREDICTED: uncharacterized protein LOC107349944              | Expressed  | -  |
| LOC107350219  | MAC perforin- and kringle-domains-containing                 | Expressed  | -  |
| LOC107350267  | golgin subfamily A member 6 2 isoform X2                     | Expressed  | -  |
| LOC107350319  | PREDICTED: uncharacterized protein LOC107350319              | -          | -  |
| LOC107350332  | PREDICTED: uncharacterized protein LOC107350332              | -          | -  |
| LOC107350363  | PREDICTED: uncharacterized protein LOC107350363              | Expressed  | -  |
| LOC107350462  | PREDICTED: uncharacterized protein LOC107350462              | -          | -  |
| LOC107350576  | PREDICTED: uncharacterized protein LOC107350576 isoform X1   | Expressed  | -  |
| LOC107350578  | piggyBac transposable element-derived 4-like                 | -          | TE |
| LOC107350624  | PREDICTED: uncharacterized protein LOC107350624              | Expressed  | -  |
| LOC107350719  | PREDICTED: uncharacterized protein LOC107350719              | Expressed  | -  |
| LOC107350727  | nuclease HARBI1                                              | -          | -  |
| LOC107350804  | ALP1-like isoform X1                                         | -          | -  |
| LOC107350863  | PREDICTED: uncharacterized protein LOC107350863              | Expressed  | -  |
| LOC107350864  | PREDICTED: uncharacterized protein LOC107350864              | -          | -  |
| LOC107350865  | PREDICTED: uncharacterized protein LOC107350865              | -          | -  |
| LOC107350914  | F-box only 43-like                                           | Expressed  | -  |
| LOC107351010  | PREDICTED: uncharacterized protein LOC107351010              | Expressed  | -  |



Table S2 (continued)

| Gene ID      | Description                                                      | Expression | TE |
|--------------|------------------------------------------------------------------|------------|----|
| LOC107351183 | PREDICTED: uncharacterized protein LOC107351183                  | -          | -  |
| LOC107351184 | PREDICTED: uncharacterized protein LOC107351184                  | -          | -  |
| LOC107351207 | PREDICTED: uncharacterized protein LOC107351207 isoform X1       | Expressed  | -  |
| LOC107351285 | RNA-directed DNA polymerase from mobile element jockey           | -          | TE |
| LOC107351746 | Pro-Pol poly                                                     | Expressed  | -  |
| LOC107351786 | Pro-Pol poly                                                     | Expressed  | -  |
| LOC107351788 | Ubiquitin-60S ribosomal L40                                      | Expressed  | -  |
| LOC107351916 | PREDICTED: uncharacterized protein LOC107351916                  | -          | -  |
| LOC107351959 | retrograde of 51 kDa-like                                        | Expressed  | -  |
| LOC107352034 | stress response NST1-like                                        | -          | -  |
| LOC107352036 | PREDICTED: uncharacterized protein LOC107352036                  | Expressed  | -  |
| LOC107352062 | PREDICTED: uncharacterized protein LOC107352062                  | Expressed  | -  |
| LOC107352063 | ---NA---                                                         | Expressed  | -  |
| LOC107352110 | histidine N-acetyltransferase-like                               | Expressed  | -  |
| LOC107352251 | PREDICTED: uncharacterized protein LOC107352251                  | Expressed  | -  |
| LOC107352371 | inner centromere -like                                           | -          | -  |
| LOC107352373 | PREDICTED: uncharacterized protein LOC107352373                  | -          | -  |
| LOC107352513 | PREDICTED: uncharacterized protein LOC107352513                  | Expressed  | -  |
| LOC107352632 | uncharacterizedproteinLOC107352632                               | -          | -  |
| LOC107352797 | PREDICTED: uncharacterized protein LOC107352797                  | -          | -  |
| LOC107352927 | uncharacterizedproteinLOC107352927                               | Expressed  | -  |
| LOC107353055 | piggyBac transposable element-derived 4-like                     | Expressed  | TE |
| LOC107353109 | Pre-mRNA-splicing factor ATP-dependent RNA helicase PRP16        | Expressed  | -  |
| LOC107353121 | PREDICTED: uncharacterized protein LOC107353121                  | Expressed  | -  |
| LOC107353157 | ATP-dependent DNA helicase Q1                                    | -          | -  |
| LOC107353220 | PREDICTED: uncharacterized protein LOC107353220 isoform X1       | Expressed  | -  |
| LOC107353261 | PREDICTED: uncharacterized protein LOC107353261, partial         | Expressed  | -  |
| LOC107353276 | PREDICTED: uncharacterized protein LOC107353276                  | Expressed  | -  |
| LOC107353325 | annexin A13-like                                                 | -          | -  |
| LOC107353455 | vesicular integral-membrane VIP36-like                           | Expressed  | -  |
| LOC107353553 | phthioceranic hydroxyphthioceranic acid synthase-like isoform X2 | Expressed  | -  |
| LOC107353587 | PREDICTED: uncharacterized protein LOC107353587                  | Expressed  | -  |
| LOC107353610 | cyclin-dependent kinase 2-like                                   | -          | -  |
| LOC107353678 | ATP-dependent DNA helicase PIF1-like                             | -          | -  |
| LOC107353712 | PREDICTED: uncharacterized protein LOC107353712                  | -          | -  |
| LOC107353718 | PREDICTED: uncharacterized protein LOC107353718                  | -          | -  |
| LOC107353739 | PREDICTED: uncharacterized protein LOC107353739                  | Expressed  | -  |
| LOC107353740 | PREDICTED: uncharacterized protein LOC107353740                  | Expressed  | -  |
| LOC107353741 | PREDICTED: uncharacterized protein LOC107353741                  | -          | -  |
| LOC107353795 | piggyBactransposableelement-derivedprotein4-like                 | -          | TE |
| LOC107353874 | uncharacterizedproteinDDB_G0271670-likeisoformX1                 | Expressed  | -  |
| LOC107353937 | Pol poly                                                         | -          | -  |
| LOC107353948 | PREDICTED: uncharacterized protein LOC107353948                  | Expressed  | -  |
| LOC107354018 | PREDICTED: uncharacterized protein LOC107354018                  | Expressed  | -  |
| LOC107354169 | PREDICTED: uncharacterized protein LOC107354169                  | -          | -  |
| LOC107354264 | PREDICTED: uncharacterized protein LOC107354264                  | -          | -  |
| LOC107354266 | PREDICTED: uncharacterized protein LOC107354266                  | -          | -  |
| LOC107354268 | nuclease HARB11                                                  | -          | -  |
| LOC107354271 | ATP-dependent DNA helicase Q1                                    | -          | -  |
| LOC107354272 | PREDICTED: uncharacterized protein LOC107354272                  | -          | -  |
| LOC107354457 | PREDICTED: protein MB21D2-like                                   | Expressed  | -  |
| LOC107354504 | PREDICTED: uncharacterized protein LOC107354504                  | -          | -  |
| LOC107354529 | acyl-coenzyme A synthetase mitochondrial-like                    | Expressed  | -  |
| LOC107354532 | jerky homolog-like                                               | -          | -  |
| LOC107354746 | PREDICTED: uncharacterized protein LOC107354746                  | Expressed  | -  |
| LOC107354754 | L-gulonolactone oxidase-like                                     | Expressed  | -  |
| LOC107354964 | HMG domain-containing 3-like                                     | -          | -  |
| LOC107354970 | PREDICTED: uncharacterized protein LOC107354970                  | -          | -  |
| LOC107355034 | PREDICTED: uncharacterized protein K02A2.6-like                  | -          | -  |
| LOC107355065 | phosphatidylinositol-glycan-specific phospholipase D-like        | Expressed  | -  |
| LOC107355068 | uncharacterizedproteinLOC107355068                               | Expressed  | -  |
| LOC107355137 | PREDICTED: uncharacterized protein LOC107355137 isoform X1       | Expressed  | -  |
| LOC107355265 | Retrovirus-related Pol poly from transposon opus                 | -          | TE |
| LOC107355310 | uncharacterizedproteinLOC107355310                               | -          | -  |
| LOC107355313 | PREDICTED: uncharacterized protein LOC107355313                  | -          | -  |
| LOC107355382 | PREDICTED: uncharacterized protein LOC107355382                  | -          | -  |
| LOC107355433 | PREDICTED: uncharacterized protein LOC107355433                  | -          | -  |
| LOC107355458 | PREDICTED: uncharacterized protein LOC107355458                  | -          | -  |
| LOC107355530 | THAP domain-containing 1                                         | Expressed  | -  |
| LOC107355532 | LIGHT-DEPENDENT SHORT HYPOCOTYLS 6                               | -          | -  |
| LOC107355545 | PREDICTED: uncharacterized protein LOC107355545                  | Expressed  | -  |
| LOC107355551 | craniofacial development 2-like                                  | -          | -  |
| LOC107355612 | bark beetle-like isoform X2 [Orbicella faveolata]                | Expressed  | -  |
| LOC107355636 | F-box only 36-like                                               | Expressed  | -  |
| LOC107355646 | uncharacterizedproteinK02A2.6-like                               | -          | -  |
| LOC107355650 | zinc finger 862-like                                             | Expressed  | -  |
| LOC107355654 | PREDICTED: uncharacterized protein LOC107355654                  | Expressed  | -  |
| LOC107355801 | PREDICTED: uncharacterized protein LOC107355801 isoform X1       | Expressed  | -  |
| LOC107355908 | PREDICTED: uncharacterized protein K02A2.6-like                  | Expressed  | -  |
| LOC107356019 | fibronectin type III domain-containing -like                     | Expressed  | -  |
| LOC107356048 | Integrase recombinase xerD-like                                  | Expressed  | -  |
| LOC107356137 | nuclease HARB11                                                  | -          | -  |
| LOC107356237 | PREDICTED: uncharacterized protein LOC107356237                  | -          | -  |
| LOC107356238 | PREDICTED: uncharacterized protein LOC107356238                  | Expressed  | -  |
| LOC107356262 | RNA-directed DNA polymerase from mobile element jockey-like      | -          | TE |
| LOC107356328 | PREDICTED: uncharacterized protein LOC107356328                  | Expressed  | -  |
| LOC107356355 | unc-13 homolog C-like                                            | -          | -  |
| LOC107356421 | PREDICTED: uncharacterized protein LOC107356421                  | Expressed  | -  |
| LOC107356427 | Transposon Tf2-9 poly                                            | -          | TE |
| LOC107356440 | reverse [Rhodotorula toruloides NP11                             | -          | TE |
| LOC107356492 | PREDICTED: uncharacterized protein LOC107356492, partial         | -          | -  |
| LOC107356511 | PREDICTED: uncharacterized protein LOC107356511                  | -          | -  |
| LOC107356513 | PREDICTED: uncharacterized protein LOC107356513                  | -          | -  |
| LOC107356514 | PREDICTED: uncharacterized protein LOC107356514                  | -          | -  |
| LOC107356544 | PREDICTED: uncharacterized protein LOC107356544                  | Expressed  | -  |
| LOC107356569 | PREDICTED: uncharacterized protein LOC107356569                  | -          | -  |

**Table S2 (continued)**

| Gene ID       | Description                                                | Expression | TE |
|---------------|------------------------------------------------------------|------------|----|
| LOC107356691  | nuclease HARB11                                            | -          | -  |
| LOC107356743  | PREDICTED: uncharacterized protein LOC107356743            | -          | -  |
| LOC107356754  | PREDICTED: uncharacterized protein LOC107356754            | Expressed  | -  |
| LOC107356783  | PREDICTED: uncharacterized protein LOC107356783            | -          | -  |
| LOC107357027  | PREDICTED: uncharacterized protein K02A2.6-like            | -          | -  |
| LOC107357102  | PREDICTED: uncharacterized protein LOC107357102            | Expressed  | -  |
| LOC107357107  | PREDICTED: uncharacterized protein LOC107357107            | -          | -  |
| LOC107357238  | OTU domain-containing 3-like                               | -          | -  |
| LOC107357335  | PREDICTED: uncharacterized protein LOC107357335            | Expressed  | -  |
| LOC107357336  | PREDICTED: uncharacterized protein LOC107357336            | Expressed  | -  |
| LOC107357459  | PREDICTED: uncharacterized protein LOC107357459            | -          | -  |
| LOC107357580  | PREDICTED: uncharacterized protein LOC107357580            | -          | -  |
| LOC107357584  | PREDICTED: uncharacterized protein LOC107357584            | -          | -  |
| LOC107357664  | PREDICTED: uncharacterized protein LOC107357664            | -          | -  |
| LOC107357668  | PREDICTED: uncharacterized protein LOC107357668            | -          | -  |
| LOC107357726  | tropomyosin beta chain-like                                | Expressed  | -  |
| LOC107357727  | myosin heavy chain-like isoform X2                         | Expressed  | -  |
| LOC107357779  | nuclease HARB11                                            | -          | -  |
| LOC107357781  | PREDICTED: uncharacterized protein LOC107357781 isoform X1 | -          | -  |
| LOC107357807  | PREDICTED: uncharacterized protein LOC107357807            | -          | -  |
| LOC107357852  | PREDICTED: uncharacterized protein LOC107357852            | -          | -  |
| LOC107358056  | uncharacterizedproteinLOC107358056                         | -          | -  |
| LOC107358094  | PREDICTED: uncharacterized protein LOC107358094            | -          | -  |
| LOC107358154  | PREDICTED: uncharacterized protein LOC107358154            | Expressed  | -  |
| LOC107358215  | PREDICTED: uncharacterized protein LOC107358215            | -          | -  |
| LOC107358216  | low-density lipo receptor-related 5-like                   | Expressed  | -  |
| LOC107358302  | PREDICTED: uncharacterized protein LOC107358302            | Expressed  | -  |
| LOC107358346  | PREDICTED: uncharacterized protein LOC107358346            | -          | -  |
| LOC107358477  | vicilin-like seed storage At2g18540                        | Expressed  | -  |
| LOC107358520  | fukutin-related -like                                      | Expressed  | -  |
| LOC107358527  | PREDICTED: uncharacterized protein LOC107358527            | -          | -  |
| LOC107358645  | mab-21-like 2                                              | Expressed  | -  |
| LOC107358656* | Toxin -60A                                                 | Expressed  | -  |
| LOC107358728  | uncharacterizedproteinK02A2.6-like                         | -          | -  |
| LOC107358734  | uncharacterizedproteinLOC107358734                         | -          | -  |
| LOC107358841  | PREDICTED: uncharacterized protein K02A2.6-like            | -          | -  |
| LOC107358885  | PREDICTED: uncharacterized protein LOC107358885            | -          | -  |
| LOC107358907  | PREDICTED: uncharacterized protein LOC107358907 isoform X1 | -          | -  |

# Table S3

Table S3. Percentage of no coverage region and RPKM of 51 PAP genes

| Gene         | No coverage (%) |       |       | RPKM  |       |       |
|--------------|-----------------|-------|-------|-------|-------|-------|
|              | S1601           | S1603 | S1606 | S1601 | S1603 | S1606 |
| LOC107340281 | 0               | 100   | 0     | 42    | 0     | 97    |
| LOC107341130 | 100             | 0     | 100   | 0     | 48    | 0     |
| LOC107338192 | 0               | 100   | 0     | 44    | 0     | 42    |
| LOC107339671 | 100             | 100   | 0     | 0     | 0     | 41    |
| LOC107332276 | 100             | 100   | 8     | 0     | 0     | 39    |
| LOC107353121 | 0               | 0     | 99    | 27    | 19    | 0     |
| LOC107340242 | 89              | 0     | 0     | 0     | 5     | 26    |
| LOC107354746 | 0               | 100   | 0     | 15    | 0     | 22    |
| LOC107329813 | 100             | 0     | 0     | 0     | 19    | 6     |
| LOC107334853 | 100             | 0     | 100   | 0     | 19    | 0     |
| LOC107333229 | 0               | 86    | 86    | 19    | 0     | 0     |
| LOC107358216 | 100             | 0     | 0     | 0     | 17    | 17    |
| LOC107329778 | 10              | 100   | 100   | 17    | 0     | 0     |
| LOC107353740 | 0               | 0     | 100   | 14    | 16    | 0     |
| LOC107339442 | 100             | 0     | 100   | 0     | 13    | 0     |
| LOC107335681 | 0               | 100   | 1     | 3     | 0     | 12    |
| LOC107329567 | 0               | 0     | 100   | 12    | 10    | 0     |
| LOC107343583 | 100             | 0     | 100   | 0     | 10    | 0     |
| LOC107354754 | 0               | 0     | 100   | 4     | 9     | 0     |
| LOC107332428 | 91              | 0     | 0     | 0     | 9     | 5     |
| LOC107337384 | 0               | 100   | 0     | 8     | 0     | 2     |
| LOC107329017 | 0               | 0     | 89    | 7     | 5     | 0     |
| LOC107353553 | 100             | 0     | 0     | 0     | 6     | 3     |
| LOC107353109 | 2               | 100   | 100   | 6     | 0     | 0     |
| LOC107354457 | 0               | 100   | 0     | 3     | 0     | 6     |
| LOC107343786 | 0               | 9     | 93    | 1     | 6     | 0     |
| LOC107338878 | 100             | 2     | 2     | 0     | 5     | 1     |
| LOC107353276 | 2               | 100   | 0     | 5     | 0     | 3     |
| LOC107342607 | 100             | 0     | 100   | 0     | 5     | 0     |
| LOC107356421 | 100             | 0     | 0     | 0     | 4     | 4     |
| LOC107357727 | 100             | 0     | 0     | 0     | 4     | 2     |
| LOC107332493 | 100             | 0     | 3     | 0     | 1     | 4     |
| LOC107347932 | 0               | 0     | 93    | 3     | 2     | 0     |
| LOC107350219 | 100             | 0     | 27    | 0     | 3     | 1     |
| LOC107334901 | 100             | 0     | 100   | 0     | 3     | 0     |
| LOC107357726 | 100             | 0     | 0     | 0     | 1     | 2     |
| LOC107351788 | 0               | 100   | 86    | 2     | 0     | 0     |
| LOC107353220 | 71              | 1     | 100   | 1     | 2     | 0     |
| LOC107355801 | 100             | 0     | 0     | 0     | 2     | 1     |
| LOC107351746 | 100             | 8     | 9     | 0     | 2     | 1     |
| LOC107357102 | 100             | 4     | 100   | 0     | 2     | 0     |
| LOC107351786 | 100             | 0     | 0     | 0     | 2     | 1     |
| LOC107328899 | 0               | 0     | 100   | 2     | 1     | 0     |
| LOC107346222 | 0               | 100   | 100   | 1     | 0     | 0     |
| LOC107355612 | 99              | 0     | 98    | 0     | 1     | 0     |
| LOC107342327 | 74              | 97    | 98    | 1     | 0     | 0     |
| LOC107335145 | 100             | 87    | 0     | 0     | 0     | 1     |
| LOC107342140 | 20              | 100   | 100   | 1     | 0     | 0     |
| LOC107354529 | 97              | 0     | 97    | 0     | 1     | 0     |
| LOC107344506 | 100             | 100   | 0     | 0     | 0     | 1     |
| LOC107358154 | 100             | 0     | 96    | 0     | 1     | 0     |



# Supporting Table S5

**Table S5.** Genome or transcriptome data used for blast databases in this study

| BLAST database      | Kingdom | -         | Phylum     | Class        | Order         | Family           | Genus                 | Species                 | RefSeq Assembly ID/URL                                                                                        |
|---------------------|---------|-----------|------------|--------------|---------------|------------------|-----------------------|-------------------------|---------------------------------------------------------------------------------------------------------------|
| Cnidaria database 1 | Metazoa | Eumetazoa | Cnidaria   | Hydrozoa     | Anthoathecata | Aplanulata       | <i>Hydra</i>          | <i>vulgaris</i>         | GCF_000004095.1                                                                                               |
|                     | Metazoa | Eumetazoa | Cnidaria   | Anthozoa     | Actiniaria    | Actiniidae       | <i>Nematostella</i>   | <i>vectensis</i>        | GCF_000209225.1                                                                                               |
|                     | Metazoa | Eumetazoa | Cnidaria   | Anthozoa     | Actiniaria    | Actiniidae       | <i>Anthopleura</i>    | <i>elegantissima</i>    | <a href="http://people.oregonstate.edu/~meyere/data.html">http://people.oregonstate.edu/~meyere/data.html</a> |
|                     | Metazoa | Eumetazoa | Cnidaria   | Anthozoa     | Actiniaria    | Aiptasiidae      | <i>Exaiptasia</i>     | <i>pallida</i>          | GCF_001417965.1                                                                                               |
|                     | Metazoa | Eumetazoa | Cnidaria   | Anthozoa     | Scleractinia  | Astrocoeniina    | <i>Madracis</i>       | <i>auretenra</i>        | <a href="http://people.oregonstate.edu/~meyere/data.html">http://people.oregonstate.edu/~meyere/data.html</a> |
|                     | Metazoa | Eumetazoa | Cnidaria   | Anthozoa     | Scleractinia  | Astrocoeniina    | <i>Seriatopora</i>    | <i>hystrix</i>          | <a href="http://people.oregonstate.edu/~meyere/data.html">http://people.oregonstate.edu/~meyere/data.html</a> |
|                     | Metazoa | Eumetazoa | Cnidaria   | Anthozoa     | Scleractinia  | Faviina          | <i>Montastraea</i>    | <i>cavernosa</i>        | <a href="http://people.oregonstate.edu/~meyere/data.html">http://people.oregonstate.edu/~meyere/data.html</a> |
|                     | Metazoa | Eumetazoa | Cnidaria   | Anthozoa     | Scleractinia  | Faviina          | <i>Orbicella</i>      | <i>faveolata</i>        | GCF_002042975.1                                                                                               |
|                     | Metazoa | Eumetazoa | Cnidaria   | Anthozoa     | Scleractinia  | Faviina          | <i>Pseudodiploria</i> | <i>strigosa</i>         | <a href="http://people.oregonstate.edu/~meyere/data.html">http://people.oregonstate.edu/~meyere/data.html</a> |
|                     | Metazoa | Eumetazoa | Cnidaria   | Anthozoa     | Scleractinia  | Faviina          | <i>Platygyra</i>      | <i>daedalea</i>         | <a href="http://people.oregonstate.edu/~meyere/data.html">http://people.oregonstate.edu/~meyere/data.html</a> |
|                     | Metazoa | Eumetazoa | Cnidaria   | Anthozoa     | Scleractinia  | Fungiina         | <i>Fungia</i>         | <i>scutaria</i>         | <a href="http://people.oregonstate.edu/~meyere/data.html">http://people.oregonstate.edu/~meyere/data.html</a> |
|                     | Metazoa | Eumetazoa | Cnidaria   | Anthozoa     | Scleractinia  | Fungiina         | <i>Siderastrea</i>    | <i>siderea</i>          | <a href="http://sites.bu.edu/davieslab/data-code/">http://sites.bu.edu/davieslab/data-code/</a>               |
| Cnidaria database 2 | Metazoa | Eumetazoa | Cnidaria   | Anthozoa     | Scleractinia  | Acroporidae      | <i>Montipora</i>      | <i>aequituberculata</i> | <a href="https://matzlab.weebly.com/data--code.html">https://matzlab.weebly.com/data--code.html</a>           |
|                     | Metazoa | Eumetazoa | Cnidaria   | Anthozoa     | Scleractinia  | Acroporidae      | <i>Montipora</i>      | <i>digitata</i>         | <a href="https://github.com/PalMuc/">https://github.com/PalMuc/</a>                                           |
|                     | Metazoa | Eumetazoa | Cnidaria   | Anthozoa     | Scleractinia  | Acroporidae      | <i>Acropora</i>       | <i>tenuis</i>           | <a href="https://matzlab.weebly.com/data--code.html">https://matzlab.weebly.com/data--code.html</a>           |
| Bilateria dataase   | Metazoa | Eumetazoa | Arthropoda | Insecta      | Diptera       | Drosophilidae    | <i>Drosophila</i>     | <i>melanogaster</i>     | GCF_000001215.4                                                                                               |
|                     | Metazoa | Eumetazoa | Chordata   | -            | -             | Branchiostomidae | <i>Branchiostoma</i>  | <i>floridae</i>         | GCF_000003815.1                                                                                               |
|                     | Metazoa | Eumetazoa | Chordata   | Ascidiacea   | Enterogona    | Cionidae         | <i>Ciona</i>          | <i>intestinalis</i>     | GCF_000224145.2                                                                                               |
|                     | Metazoa | Eumetazoa | Chordata   | Mammlia      | Rodentia      | Muridae          | <i>Mus</i>            | <i>musculus</i>         | GCF_000001635.25                                                                                              |
|                     | Metazoa | Eumetazoa | Nematoda   | Chromadorea  | Rhabditida    | Rhabditidae      | <i>Caenorhabditis</i> | <i>elegans</i>          | GCF_000002985.6                                                                                               |
| Sponge              | Metazoa | -         | Prorifera  | Demospongiae | Haplosclerida | Nophatidae       | <i>Amphimedon</i>     | <i>queenslandica</i>    | GCF_000090795.1                                                                                               |

# Table S6

Table S6. Information for high-throughput sequencing data

| Sample name         | SRA number | CDS average coverage |
|---------------------|------------|----------------------|
| Kerama_Geruma_KrA10 | DRR099374  | 9.8                  |
| Kerama_Geruma_KrA12 | DRR099376  | 10.4                 |
| Kerama_Geruma_KrA13 | DRR099377  | 9.6                  |
| Kerama_Geruma_KrA4  | DRR099383  | 10.4                 |
| Kerama_Geruma_KrA6  | DRR099385  | 10.3                 |
| Kerama_Yakabi_KrC10 | DRR099359  | 9.5                  |
| Kerama_Yakabi_KrC11 | DRR099360  | 11.7                 |
| Kerama_Yakabi_KrC12 | DRR099361  | 10                   |
| Kerama_Yakabi_KrC13 | DRR099362  | 11.9                 |
| Kerama_Yakabi_KrC14 | DRR099363  | 10.1                 |
| Kerama_Yakabi_KrC15 | DRR099364  | 9.5                  |
| Kerama_Yakabi_KrC5  | DRR099369  | 9.8                  |
| Kerama_Yakabi_KrC7  | DRR099371  | 10                   |
| Kerama_Yakabi_KrC8  | DRR099372  | 12.4                 |
| Kerama_Yakabi_KrC9  | DRR099373  | 10                   |
| Kerama_Zamami_KrE1  | DRR099344  | 10.8                 |
| Kerama_Zamami_KrE2  | DRR099345  | 10.8                 |
| Kerama_Zamami_KrE4  | DRR099347  | 10                   |
| Kerama_Zamami_KrE5  | DRR099348  | 9.6                  |
| Kerama_Zamami_KrE6  | DRR099349  | 20.1                 |
| Kerama_Zamami_KrE8  | DRR099351  | 15.2                 |
| Okinawa_Manza_Mz1   | DRR099303  | 10.4                 |
| Okinawa_Ohdo_Od10   | DRR099315  | 10.3                 |
| Okinawa_Ohdo_Od11   | DRR099316  | 10.1                 |
| Okinawa_Ohdo_Od12   | DRR099317  | 10.5                 |
| Okinawa_Ohdo_Od13   | DRR099318  | 10                   |
| Okinawa_Ohdo_Od19   | DRR099322  | 10                   |
| Okinawa_Ohdo_Od23   | DRR099324  | 9.7                  |
| Okinawa_Ohdo_ohdo1  | DRR099334  | 9.6                  |
| Okinawa_Ohdo_ohdo3  | DRR099335  | 10.2                 |

# Table S7

Table S7. Primer sequences

| Primer name   | Primer sequence (5'-3')         |
|---------------|---------------------------------|
| 29813_LF1     | CAGGTGTGAACGTAATCTCGCATGAAACGA  |
| 29813_LR1     | ACTGGTKACTTTGCTTCACCTGTTGAACGC  |
| 29813_checkF1 | CAAAGGCTTTCTCAGCATTGTGCGCCAAGA  |
| 29813_checkR1 | ACCTGGCTTCAAATTTTGGCGCTTGCAAAC  |
| 29813_F2      | TCTATAAAAACGCCGTGACAGGAAT       |
| 29813_F5      | GGTTRCAAAAGGTAAAGTTCGACATG      |
| 29813_R2      | CCATATTCTGGAGTATCCATTCTG        |
| 29813_R3      | CGTATTCTTAGAGAGCCTTATTTCAAG     |
| 29813_checkR3 | TGCAAACAATAAGTTGCTCGATCCA       |
| 29813_R4      | CAGTCCGTAAAAATGCCGTGACCAA       |
| 29813_R5      | TTGTGGCAAACCTGCTTGACTTCGTT      |
| 29813_R6dig   | TAAAAATGCCGTGACAGAGGCCTAGT      |
| 29813_R6ten   | AGGGCCAATGAAACCAACAACTGAA       |
| 29813_R7ten   | CTTGGGTTACTTGAGGTAATTAAGC       |
| 29813_R8ten   | GAATCTCAAGTAGCCCAGGAAGTT        |
| 29813_R9ten   | TGATATCAAATCGATCCGCTTGTT        |
| 51959_checkF1 | CAGGGAAATAGCGCAGCARCTTGAAGATTC  |
| 51959_checkR1 | GGCCTCGTTCTTTTCATMTATTTCCCTCTT  |
| 36916_LF1     | CCCTGGTGTWGTAAATTCATCTTCTAGGA   |
| 36916_LR1     | AACGAGGACGAATCGCTTTCCGTTCCAGAA  |
| 36916_checkF2 | AGAAGCAGTGCAGAATCACAACTGCAGTT   |
| 36916_sF1     | CAATGCTTTCTTTTCCATCGAGTT        |
| 36916_sF2     | TTGTTTTCTACGAGCGATAGTCAAC       |
| 36916_sF3     | TTGAACGGGGTTGATATCTGGAT         |
| 36916_sF4     | GGATRTATTTGAACCACACTCAA         |
| 36916_sF5     | GCACTTTCCATTTGATATAATTTGG       |
| 36916_sR1     | TAGAAAACAAGGGCGAGTAGTCTA        |
| 36916_sR2     | GCAAAATTTGGAAGAGCTAAAAGTC       |
| 36916_sR3     | TTCCCTCTCAATTCGTTCTTTTTCC       |
| 34639_F1      | CACACGTCCAACAGGCACTGTTCCAATA    |
| 34639_R1      | CCYGGACATCGTGATTTTCATCAAGAACATG |
